# Supplementary material for: Unraveling the Role of RNA-Binding Proteins, with a Focus on RPS5, in the Malignant Progression of Hepatocellular Carcinoma
Source: Int J Mol Sci. 2024 Jan 7;25(2):773. doi: 10.3390/ijms25020773 (PMC10815211; doi:10.3390/ijms25020773)
Supplement: Supplementary file 1 [file ijms-25-00773-s001.zip › Supplementary Table S1-S4.xlsx]

## Sheet: Sup table S1
DEGs	RBPs	DEGs∩RBPs
ZWINT	RECQL	ZNF468
ZWILCH	CREBBP	ZNF318
ZSWIM5	IBTK	ZFP36
ZSCAN2	RPUSD1	ZFP1
ZSCAN16	TSR3	ZBTB41
ZNF664	ZBTB32	YWHAZ
ZNF623	EHD3	YWHAH
ZNF57	ZFP64	XPOT
ZNF544	RTF2	XPO5
ZNF468	BCLAF1	XPO1
ZNF318	ARID4A	UTP14A
ZNF251	DAPK2	USP14
ZNF146	RFC1	UHRF1
ZKSCAN5	HSPA5	UCHL5
ZKSCAN3	MAP4	UBR5
ZG16	NOP16	UBAP2L
ZFP62	FAM120A	TXNRD1
ZFP36	MAPK9	TXN
ZFP1	PLEKHA5	TUBA1C
ZBTB41	CYFIP2	TTK
YWHAZ	GATB	TSNAX
YWHAH	SFSWAP	TSN
YIF1B	ZNF112	TSEN15
YEATS4	EIF4B	TRMT6
YEATS2	RPL18	TRMT12
XPR1	PKN2	TPX2
XPOT	WDR18	TPR
XPO5	KARS	TOP2A
XPO1	SPEN	TMPO
XDH	ZC3H15	TKT
WSB2	DHX29	TDRKH
WFS1	RRP15	TCOF1
WDR76	POLR1A	TBCE
WDR72	SRBD1	TARBP1
VWF	NUCKS1	TAGLN2
VSIG10	ELP1	SUB1
VRK1	LMAN1	STT3A
VPS72	HACD3	STIP1
VPS45	ZNF638	SSR1
VPS33A	MARK3	SSBP1
VNN1	FSCN1	SRPK1
VMO1	MCM6	SRP9
VMA21	REXO2	SQSTM1
VIPR1	SPAG5	SPATS2
VIL1	ARHGEF1	SNRPE
VCAN	TOP2B	SNRPD2
VBP1	GTF3C1	SNRPD1
VAT1	CAPZB	SNRPC
UXS1	RBFOX1	SNRPB
UTP14A	THOC1	SNRPA
USP14	SAR1A	SMC4
USP1	HSP90AA1	SMC3
UROC1	RAB10	SMC2
UNC5B	IPO11	SLBP
UHRF1	RBM22	SH3PXD2B
UFC1	ZW10	SF3B4
UCHL5	GANAB	SETDB1
UBXN2B	PAPOLA	SET
UBR5	NUDC	SERPINH1
UBL4A	TNRC6A	SAE1
UBE2T	ZFHX4	RUVBL1
UBE2S	DPYSL2	RRP15
UBE2Q2	ERMP1	RRM2
UBE2C	RAB18	RRM1
UBE2A	TRMT2A	RPS5
UBAP2L	LGALS1	RPS27
UBA2	EIF3L	RPS21
TYMS	SNU13	RPP40
TXNRD1	POLR2F	RPN2
TXNDC9	RPL3	RPL8
TXN	EIF3D	RPL38
TUG1	TNRC6B	RPL30
TUFT1	ZC3H7B	RPL27
TUBG1	PRMT5	RPL22L1
TUBE1	ALKBH1	RNASEH2A
TUBB2A	TELO2	RHEB
TUBA1C	RPS6KA5	RFC4
TUBA1B	SEC23A	RFC3
TTL	ZMYND8	RECQL4
TTK	CSTF1	RCL1
TTC39A	EEF1A2	RCC2
TTC36	MAPRE1	RBM8A
TTC13	CELF4	RBM24
TSNAX	MCTS2P	RBM15B
TSN	PCSK1N	RBBP7
TSLP	N4BP1	RBBP4
TSKU	ACD	RAN
TSEN15	POLR2C	RALY
TROAP	PSMD7	RAD54L
TRNP1	CAPN15	RAD18
TRMT6	EARS2	RACGAP1
TRMT12	SALL1	R3HDM1
TRIP13	MAZ	PYGB
TRIM50	KAT8	PUF60
TRIM47	TRIP4	PTPRG
TRIM45	RAB11A	PTGFRN
TRIM37	RPAP1	PTBP3
TRIM24	EHD4	PSMD4
TRIM11	POP1	PSMD2
TRIB1	EIF3E	PRRC2C
TRAIP	ERI1	PRMT5
TPX2	UBXN8	PRMT3
TPRKB	SARS2	PRKDC
TPR	CLASRP	PRIM2
TPPP2	SF3A2	PRC1
TPM4	NOVA2	PPM1G
TPM3	SNAPC2	PPIA
TPM1	RPS16	POLR2K
TPD52L2	FBL	POLR2G
TP53I3	RPS19	POLA1
TOR3A	RPL18A	PLOD3
TOP2A	HBP1	PHGDH
TOMM5	OGDH	PDIA6
TOMM20	RBM28	PCNA
TMSB10	PHF14	PARP1
TMPO	RHEB	PAPSS1
TMEM98	ELAVL2	PAIP2B
TMEM9	DDX58	OLA1
TMEM69	EDF1	NXT2
TMEM38B	DNMBP	NUSAP1
TMEM209	EIF3A	NUP155
TMEM201	SEC23IP	NUP133
TMEM185B	NPM3	NUP107
TMEM14B	GBF1	NTPCR
TMEM147	CPEB3	NRAS
TMEM106C	LARP4B	NQO1
TMEM104	RPL19	NPM1
TMEM101	DHX40	NNMT
TMCO3	CCDC47	NME1
TMCO1	PSMD11	NHP2
TM6SF2	RAB5C	NCAPG2
TLCD1	LRRC59	NCAPG
TKT	EFTUD2	NCAPD2
TK1	ALDOC	NAP1L1
TIPRL	DHX15	MTHFD1
TIMM9	NEIL3	MSH6
TIMD4	UGDH	MSH2
TIGD1	ZBTB16	MRPS23
THY1	PPP6R3	MRPS21
THRSP	CCDC86	MRPS17
THEM4	CHORDC1	MRPS14
THBS4	EIF4G2	MRPL9
TES	RPS13	MRPL47
TDRKH	PRDM4	MKI67
TCOF1	COQ5	METTL5
TCF19	CAPRIN2	METTL18
TBXA2R	MLEC	MCM7
TBCE	LTA4H	MCM6
TBC1D7	DDX55	MCM5
TBC1D16	NUP107	MCM4
TATDN1	GAPDH	MCM3
TARBP1	CHD4	MCM2
TAGLN2	TDP2	MBNL2
TAF6	SMAP1	MAPRE1
TACSTD2	RPS12	MAP4K4
TACC3	QKI	MANF
TACC2	BYSL	MAGED2
SYT9	TENT5A	MAGED1
SWAP70	KIF20A	LSM4
SUV39H2	NNT	LSM2
SUV39H1	CLINT1	LRRC59
SUSD4	CNOT6	LMNB2
SULT1E1	BRIX1	LIG1
SULT1C2	TCERG1	LGALS3
SULT1A2	CPEB4	LBR
SUB1	DBN1	LASP1
STXBP6	ZNF346	KPNA2
STX6	GNAI2	KNTC1
STT3A	FXR1	KIF5B
STMN1	GBE1	KIF4A
STK39	ATP6V1A	KIF2C
STIP1	ZBTB47	KIF23
STEAP4	SF3B6	KIF20A
STEAP3	MOGS	KIF15
STC2	MRPL19	KIF14
STC1	THADA	KIF11
STAB2	SUMO1	IPO9
ST3GAL6	CHD5	IMPDH2
SSR3	PARK7	ILF2
SSR2	AMPD2	IGF2BP2
SSR1	SMG7	HYOU1
SSBP1	GADD45A	HTATSF1
SRXN1	CD58	HSPH1
SRPX	PRPF3	HSPB1
SRPK1	P3H1	HSPA4
SRP9	EBNA1BP2	HSP90AB1
SRD5A3	IPO13	HSP90AA1
SRD5A2	ARID1A	HMGB3
SRD5A1	PLAGL1	HMGB2
SQSTM1	CPSF3	HELLS
SQLE	HEATR1	HEATR6
SPSB2	PTBP3	HEATR1
SPRYD4	SET	HAT1
SPRY2	GLE1	GTSE1
SPP1	RBM25	GTPBP2
SPC25	HELLS	GPATCH4
SPC24	MTHFD1L	GNMT
SPATS2	ENOX1	GMPS
SP5	MTRF1	GFPT1
SOX9	HSPH1	GADD45G
SOX4	PAIP2	GADD45B
SORT1	ARL1	G6PD
SORL1	TRIM25	FTH1
SOCS7	NCAPH	FEN1
SOCS2	TMEM131L	FBL
SNX27	TENT4B	FANCI
SNRPE	ZRANB3	FANCD2
SNRPD2	MTERF4	FAM83D
SNRPD1	OCRL	FABP5
SNRPC	MRPS2	EXOSC4
SNRPB	RBBP6	ESPL1
SNRPA	ZC3H7A	ERMP1
SNAPIN	ANXA11	ENAH
SMYD3	RPL5	EIF4A3
SMYD2	TRMT13	EIF3H
SMC4	SEPT7	EIF3E
SMC3	HNRNPA2B1	EIF2D
SMC2	P4HA1	EHD4
SMARCE1	ZC3H13	EHD3
SLCO4C1	SPATS2	ECHS1
SLCO2B1	RAB9A	DYNLL1
SLCO2A1	EXOSC9	DTYMK
SLCO1B3	ACSL3	DNMT1
SLC9A6	CHD6	DNM1L
SLC7A2	GTSF1L	DNASE1L3
SLC6A8	ZNFX1	DNAJC9
SLC6A12	RAB22A	DLAT
SLC50A1	DDX27	DHX9
SLC46A3	SNRNP27	DHX57
SLC45A4	RRP36	DCAF13
SLC44A3	SERPINB6	DBN1
SLC41A3	SSR1	DARS2
SLC41A2	RIOK1	DAP3
SLC39A6	ATXN1	CUL4B
SLC39A5	LRRFIP1	CSTF2
SLC39A14	GOT2	CSE1L
SLC39A10	PIWIL1	CS
SLC38A6	UPF3B	CPSF3
SLC38A2	SRMS	CPEB3
SLC36A1	THOC2	COPA
SLC2A5	SNRPD2	CNOT6
SLC28A1	GZF1	CLIC1
SLC27A5	DTD1	CKAP4
SLC26A6	RRBP1	CKAP2
SLC26A2	SNRPB2	CEP55
SLC25A47	RALY	CENPF
SLC25A43	CEP250	CDKN2A
SLC25A25	RBM42	CDC6
SLC22A7	SCAF1	CD58
SLC22A1	EMG1	CCT7
SLC1A4	KTN1	CCT6A
SLC1A1	TRMT5	CCT5
SLC19A3	CANX	CCT4
SLC17A5	INTS11	CCT2
SLC16A2	UBR4	CBX3
SLC13A5	METTL16	CAPRIN1
SLBP	PNKD	CAPN2
SKP2	ZFP36	CAPG
SKAP1	DGCR8	CANX
SKA2	LSM8	CACYBP
SKA1	MRPS12	C8orf33
SIPA1L3	MYO1B	C7orf50
SIGLEC7	SNRPN	C1orf131
SHCBP1	FXR2	BZW2
SHC1	KRI1	BUB3
SHBG	EGLN3	BCAP31
SH3PXD2B	SAFB2	AZGP1
SFT2D2	GTPBP3	ATP1A1
SFRP1	LSM7	ATIC
SF3B4	ACTN4	ATAD2
SEZ6L2	LSM4	ASS1
SETDB1	CEP85	ASPM
SET	EIF3G	ARL4A
SESTD1	C19orf66	ARL2
SERPINI1	PPIL4	ARHGEF2
SERPINH1	AAR2	APOBEC3B
SERPING1	RBM39	ANXA2
SERPINF2	PDLIM4	ANP32E
SERPINA4	NDUFA2	ANLN
SERPINA10	DIAPH1	ALDOA
SERPINA1	ZCCHC9	ALDH18A1
SEMA3F	CHD1L	AHCTF1
SEC61G	SNRPA1	ADNP
SDF2L1	LIN28A	ACLY
SCP2	LAS1L	ACAT1
SCGN	LASP1	ACAA2
SCAMP3	RBM5	ABCF2
SARDH	ARF5	ABCC4
SAE1	FKBP4
SAC3D1	RBM6
SAAL1	UPF1
S100A10	SLC25A5
RUVBL1	POLR2J
RUSC1	DHX33
RTN3	LIG3
RSPO3	REXO5
RRP15	SPPL2B
RRM2	MSL3
RRM1	MYCBP2
RPS5	YBX2
RPS27	AP2B1
RPS21	GGCT
RPP40	PAF1
RPN2	ELAC2
RPL8	CCDC124
RPL38	LUC7L
RPL30	SPAG9
RPL27	HEATR5B
RPL22L1	SEC62
RPIA	RPS20
ROBO1	CSDE1
RNF8	BAZ1B
RNF187	EEF1AKNMT
RNF157	ZNF207
RNF125	UQCRC1
RND3	NCAPD2
RNASEH2A	ELOA
RMI2	AKAP8L
RMI1	UTP18
RIT1	PTBP1
RIPK4	LARS2
RHOB	ANLN
RHEB	PPP5C
RGS5	BRCA1
RFXANK	MVP
RFX5	POLR3B
RFC4	ANGEL1
RFC3	DNASE1L1
REEP6	UFL1
RECQL4	ZC3H3
RDH16	CAPN1
RCN2	MDH1
RCL1	YAF2
RCC2	MATR3
RCBTB1	AGPS
RCAN1	ZNF582
RBP7	SNAI2
RBP5	ZRANB1
RBM8A	MRE11
RBM24	AQR
RBM15B	CPS1
RBL1	NDUFS1
RBBP7	RB1CC1
RBBP5	ERP44
RBBP4	GCLM
RASSF4	EHD2
RASSF3	TOMM34
RASGEF1B	SEC63
RAP2A	KPNA6
RAN	VIM
RALY	RNASET2
RALBP1	TFB1M
RALA	HMGB3
RAD54L	NUP160
RAD51C	SARS
RAD51AP1	RANBP3
RAD51	ZCCHC8
RAD21	ABCF2
RAD18	UBA6
RAD1	VCL
RACGAP1	ADSS
RABIF	RPL26L1
RAB3B	NSUN2
RAB11FIP4	MRI1
R3HDM1	BOD1L1
PZP	EDC4
PYGO2	TRIO
PYGB	MTREX
PXMP2	RAI14
PUF60	STAU2
PTTG1	LSG1
PTPRG	PARP3
PTP4A3	CAPG
PTH1R	TRIT1
PTGIS	CTNNA1
PTGFRN	DSG2
PTGES3	GEMIN8
PTBP3	OFD1
PSPH	YTHDC2
PSMG3	POLR2B
PSME3	TPR
PSMD4	ZNF800
PSMD2	MRPS10
PSMD14	RSF1
PSMD10	CELF2
PSMC4	R3HDM1
PSMB4	RFC2
PSAT1	PTCD2
PRTFDC1	LIMA1
PRSS8	POLQ
PRRC2C	THOC3
PRR11	RRP12
PRPSAP1	MRTO4
PROZ	THRAP3
PROS1	ARID4B
PRODH2	KIF1B
PRMT5	SYNE2
PRMT3	NOP58
PRKDC	CUL1
PRKAA2	TAB2
PRIM2	EIF2AK2
PRIM1	USP36
PRG4	PUM2
PRELP	MRPL43
PRCC	ZFR
PRC1	RC3H2
PPP4R1	PKP2
PPP2R5A	GDI2
PPP1R3B	SEC61A1
PPP1R1A	PPP1R12A
PPOX	ZC3H11A
PPM1G	RIOK2
PPIL1	UNKL
PPIA	PARP12
PON3	ALDH18A1
POLR2K	TARBP1
POLR2G	YBX3
POLH	WNK1
POLA1	CCAR1
POGK	OGFR
PODXL	SNRNP40
PNMA1	CS
PLXNC1	MRPS24
PLXNA1	WAPL
PLXDC1	POLD1
PLVAP	U2AF2
PLSCR4	HAGH
PLP2	TNPO3
PLOD3	SUGP2
PLK1	SLC12A2
PLIN2	CNN2
PLIN1	DDX20
PLCB1	SBNO2
PLAC8	AP3D1
PJA1	GNAI3
PIR	IPO5
PIPOX	OAT
PIP4K2C	WDR3
PIK3C2B	ADAT1
PIGX	SLK
PIGT	CDK13
PIGM	YBX1
PIGC	ELAVL1
PIAS3	DIP2B
PHYHIPL	ASPM
PHYHD1	LRRC40
PHGDH	TRMT11
PHF19	THUMPD1
PGP	DDX3Y
PGM1	PKM
PFKFB2	DNTTIP2
PFDN4	TP53BP1
PEX2	DHX8
PEX11B	IARS2
PEMT	ROCK1
PEA15	HEATR6
PDZK1IP1	COASY
PDZK1	INPP5A
PDZD11	GPKOW
PDSS1	FTSJ1
PDRG1	KIF2A
PDIA6	PSME4
PDGFA	NUP133
PDE2A	VPS35
PDCL	PHRF1
PDCD5	PFN2
PDCD2L	SMG6
PCNA	JMJD6
PCK1	ASNS
PBLD	PABPC1
PBK	TCOF1
PARVB	RAD18
PARP1	MAP4K4
PAQR5	RPL31
PAQR4	WDR1
PAPSS1	BUD23
PANK1	DAZAP1
PALM3	MBD3
PAIP2B	HLTF
PAFAH1B3	FAM50A
OTUD6B	CPSF1
OSBPL3	ACTN1
ORC6	TFRC
OLFML2A	AFF4
OLA1	SMC1A
OIT3	HSD17B10
OIP5	P4HA2
OGDHL	TRNT1
NXT2	ACADVL
NUSAP1	SIDT1
NUP37	MCM2
NUP155	NLE1
NUP133	SDHA
NUP107	FERMT2
NUF2	IGF2BP2
NUDT1	NSF
NUDCD1	CLASP1
NTPCR	MRPS34
NTN4	NCBP3
NTF3	NUAK1
NT5DC2	ZZEF1
NSMCE2	ENO1
NSL1	EIF4G3
NRG1	GTSE1
NRAS	ACAT1
NR2C2AP	FNDC3B
NR1I2	FRYL
NR0B2	TMEM131
NQO1	WDR62
NPY1R	RAB7A
NPNT	SART3
NPM1	EXOSC7
NPC1L1	MKRN2
NPC1	RBM7
NOTCH3	RBMS2
NNMT	BAZ2A
NME1	PTPN23
NHP2	GPATCH1
NGFR	MBNL3
NFYA	XAB2
NEU1	TM9SF3
NES	SNRPA
NEK2	EXOSC5
NEDD4L	DYNC1I2
NECAB3	MCCC1
NDUFB9	SYNJ2
NDUFA4L2	NRDC
NDRG3	TNRC6C
NDRG2	MYH7B
NDC80	XRCC5
NCSTN	REXO1
NCAPG2	DDX1
NCAPG	EPB41L2
NCAPD2	RABL2B
NAT2	DDX43
NAP1L1	RIF1
NAAA	SMARCA2
NAA40	SRCAP
NAA20	PUM3
N4BP2L1	CNOT4
MZT1	EXD2
MYO5C	WDR70
MYBL2	BZW1
MUC6	MRPL22
MUC13	GEMIN5
MTX1	XPO1
MTMR11	TUT7
MTHFD1	ULK2
MT2A	TNPO1
MT1X	PLOD1
MT1M	DIS3
MT1H	TDRD3
MT1G	NUFIP1
MT1F	PDS5B
MT1E	RRAGB
MSTO1	RPS5
MST1	YTHDC1
MSRA	PPIE
MSH6	ZMPSTE24
MSH2	NOA1
MS4A6A	WBP11
MRPS23	EIF3I
MRPS21	TXLNA
MRPS17	APOB
MRPS14	HADHA
MRPL9	ATRX
MRPL47	MYNN
MRO	CPNE3
MRAP2	CTTN
MPZL1	MTIF2
MPPED1	EPS15
MOSPD1	CHERP
MOGAT2	RAD54L
MNS1	DNAJA1
MND1	NFX1
MMP11	DIMT1
MKI67	MRPL28
MIS18A	TXLNG
MICB	HUWE1
MFSD6	TRIP6
MFSD5	SRRT
MFSD2A	PSMC5
MFAP4	NOP14
MFAP3L	ADD1
METTL5	SF3B2
METTL18	DNM1L
METTL13	METTL2A
MESP1	CNOT3
MELK	DDX18
MED20	KHSRP
MEA1	TPX2
MDK	XRN2
MCM8	DYNLL1
MCM7	RPL6
MCM6	ESF1
MCM5	OAS1
MCM4	GCN1
MCM3	RPLP0
MCM2	PXN
MCM10	TRMT6
MCC	PEBP1
MCAM	FUS
MBNL2	RBM41
MBL2	DDX24
MAT1A	DHX32
MASP2	CCNK
MASP1	PCBP4
MARCO	MRPS33
MAPRE1	P3H2
MAP4K4	GOLGA3
MAP2	PABPC4
MANF	AARS
MANEAL	KIF4A
MAN1C1	RBM27
MAGED2	PUS7
MAGED1	DLD
MAD2L1	MAP3K20
LYVE1	FH
LYRM4	CDV3
LYPD1	ALKBH5
LY6E	SPAG7
LSM4	ZC3HC1
LSM2	HECTD1
LRRC59	HNRNPC
LRRC1	SUPT16H
LRP11	GEMIN2
LRG1	DAZL
LPL	PHGDH
LPIN2	EZR
LPGAT1	MYL6
LPCAT1	AGO1
LPA	GPATCH2
LOXL2	NUP50
LOX	LRRFIP2
LMNB2	CDC6
LIX1L	AAAS
LINC00261	MSH2
LIN9	ARCN1
LILRB5	PSMD5
LIG1	NUP188
LGALS3	CWF19L1
LEF1	BTAF1
LEAP2	TDRD1
LDLR	SRPK1
LDHD	MRPS18A
LCN2	HSP90AB1
LCAT	CDC5L
LBR	ITPR3
LASP1	DSP
LAPTM4B	HNRNPH3
LANCL1	SETD1A
LAMC1	CIRBP
LAMB1	HNRNPM
LAMA4	POLR2E
LAMA3	POLRMT
LAGE3	GADD45B
KRTCAP2	RANBP1
KPNA2	MED15
KNTC1	CRKL
KMO	SF3A1
KLKB1	SPECC1L
KLHL23	SNRPD3
KLHL12	PES1
KLF6	MAPK1
KLF11	TOP3B
KLC2	ESS2
KITLG	PATZ1
KIF5B	TFIP11
KIF4A	MICALL1
KIF2C	SEPT3
KIF23	DDX17
KIF20A	TCF20
KIF18B	RTCB
KIF15	GTPBP1
KIF14	POLDIP3
KIF11	RAB36
KIAA1522	SBF1
KHK	CYB5R3
KDM5B	AP1B1
KDELR3	MCAT
KCNN2	THOC5
KCNE3	MCM5
KCND3	APOBEC3H
KBTBD11	TTLL12
JRKL	ZMAT5
JAG2	RBFOX2
JAG1	ASCC2
IYD	MYH9
IVD	RANGAP1
ITGB3BP	PHF5A
ITGB1BP1	ACO2
ITGA9	POLR3H
ITGA6	TRMU
ITGA2	KHNYN
IRX3	FKBP3
IQGAP3	RBM23
IQCE	PYGL
IPO9	PSMC6
INTS8	SNW1
INTS7	CEP128
INMT	ERH
INHBC	SRSF5
IMPDH2	EIF5
ILF2	DICER1
IL33	MTHFD1
IL1RAP	ZC3H14
IKBIP	PSMC1
IGSF3	ACIN1
IGFBP4	APEX1
IGFBP3	PABPN1
IGFALS	SRP54
IGF2BP2	CHD8
IFT52	PNN
IER2	PYGB
IDI1	PABPC1L
ID2	SALL4
ID1	ADNP
HYOU1	PRPF6
HTATSF1	MTG2
HTATIP2	PSMA7
HSPH1	DIDO1
HSPB1	ARFRP1
HSPA4	NDUFAF5
HSP90AB1	SEC23B
HSP90AA1	CRNKL1
HS3ST3B1	SAMHD1
HRCT1	NOP56
HPS5	AHCY
HPGD	FAM83D
HOGA1	DHX35
HMMR	RBFA
HMGN4	USP14
HMGN2	VAPA
HMGN1	METTL4
HMGCS2	SMCHD1
HMGCL	RNMT
HMGB3	MIB1
HMGB2	RIOK3
HMGA1	CSTF2
HKDC1	POLA1
HJURP	NKAP
HHIP	NXT2
HGS	STAG2
HGFAC	PLS3
HGF	SMARCA1
HEY1	ZC3H12B
HES6	RBBP7
HELLS	FMR1
HEATR6	EMD
HEATR1	PGK1
HDAC11	EEA1
HBB	HTATSF1
HAUS5	PIN4
HAUS1	MAGED2
HAT1	RBM3
HAO2	FNDC3A
HAMP	PARP4
HABP2	MRPS31
HAAO	KPNA3
GYS2	INTS6
GYG1	CORO1A
GTSE1	NUTF2
GTPBP2	NUP93
GTF2IRD1	ZNF423
GTF2E1	CTCF
GSTZ1	USB1
GSTA4	ESRP2
GRPEL2	MPG
GREM2	TSC2
GRAMD1C	ABCC1
GRAMD1A	MTHFSD
GPX7	HAGHL
GPT	PIEZO1
GPSM1	GSPT1
GPR182	NOMO1
GPM6A	RNF40
GPD1	KNOP1
GPC3	HERC1
GPATCH4	ZNF106
GPAA1	TJP1
GOSR2	DNAJC17
GORAB	EIF3J
GOLT1B	MYEF2
GOLPH3L	INTS9
GOLM1	RAB2A
GNS	ESRP1
GNPDA1	UBR5
GNPAT	EEF1D
GNMT	R3HCC1
GNE	GSR
GNB5	MCM4
GNAZ	KCNN4
GNAO1	HNRNPL
GNAI1	SNRNP70
GNA12	PIH1D1
GMPS	PPP1R13L
GMNN	ERCC2
GMFB	RNASEH2A
GM2A	TRMT1
GLYAT	PPP6R1
GLTPD2	AKAP8
GLS2	CASP14
GLS	POP4
GLIS2	GPI
GLA	POLR2I
GJA1	ZFR2
GIPC2	CACTIN
GINS2	CCDC9
GINS1	HNRNPUL1
GHR	PLIN3
GGT5	MRPL4
GGPS1	NOP53
GFPT1	CDC37
GCKR	GRWD1
GCH1	LIG1
GCGR	FAM83E
GCDH	PPP2R1A
GBA3	TNPO2
GALNT10	PRPF31
GADD45G	DDX49
GADD45B	SUGP1
G6PD	ATP13A1
FZD6	ZNF574
FXYD1	ETHE1
FUNDC1	GTPBP10
FTH1	DNAJC2
FTCD	TWISTNB
FOXO1	DUS4L
FOXM1	ZC3HAV1
FOXK1	H2AFV
FOS	BRAT1
FOLH1B	SSBP1
FNDC4	GARS
FNBP1L	HSPB1
FLVCR1	PDAP1
FLAD1	PTCD1
FKBP11	EIF3B
FITM2	AIMP2
FITM1	LSM5
FIGNL1	PLOD3
FIBP	GIMAP2
FGA	MRPL32
FERMT1	POLD2
FEN1	TBL2
FCN3	EIF4H
FCN2	SEC61B
FCGR2B	FUBP3
FBP1	SETX
FBL	PDLIM1
FAT1	DDX50
FANCI	TNKS2
FANCG	GTPBP4
FANCE	BCCIP
FANCD2	MTPAP
FAM83D	PITRM1
FAM20B	STN1
FAM199X	GLRX3
FAM151A	SMC3
FAM149A	TFAM
FAM111B	RPL28
FAM110C	NUFIP2
FAIM	UBTF
FABP5	PSMD3
FABP4	CASC3
FABP1	SEPT4
F9	KPNB1
F11	RECQL5
EZH2	INTS2
EXOSC4	PFN1
EXO1	SLC25A11
ETV4	NUP88
ETS2	C1QBP
ETFDH	DRG2
ESR1	FTSJ3
ESPL1	UTP6
ESM1	DDX5
ERRFI1	ASIC2
ERMP1	DHX58
ERLIN1	PTGES3L-AARSD1
EPS8L3	MRPL27
EPHX2	LUC7L3
EPHA2	YWHAE
EPB41L4B	SLC9A3R1
ENO3	SUPT6H
ENAH	RAB34
EME1	SLAIN2
ELOVL2	MAPK10
ELFN2	RPL34
EIF4A3	GAR1
EIF3H	FRG1
EIF3E	NCAPG
EIF2D	PPARGC1A
EHMT2	DDX25
EHD4	MTCH2
EHD3	HSPA8
EGR1	EHD1
EFNA4	PUS3
EEF1E1	DCPS
EDNRB	PRPF19
EDIL3	DDX6
ECT2	CARS
ECM1	C11orf58
ECHS1	NUP98
E2F8	PSMD9
E2F3	CORO1C
DYRK2	ATP5F1B
DYNLRB1	RSRC2
DYNLL1	KRT18
DUSP9	METAP2
DUSP12	MAGOHB
DUSP1	PARP11
DTYMK	OAS3
DTX1	OAS2
DTNA	EIF2B1
DTL	ENDOU
DSN1	CAND1
DSCC1	RAB5B
DPT	CNOT2
DPH3	TIMELESS
DONSON	CPSF6
DNMT1	KRR1
DNM1L	MRPL51
DNASE1L3	NOP2
DNAJC9	USP5
DNAJC12	TPI1
DNAJB11	APOBEC1
DMGDH	LDHB
DLGAP5	AICDA
DLG5	RAB35
DLAT	SRSF9
DIRAS3	BTN3A3
DHX9	PAK1IP1
DHX57	RNGTT
DHTKD1	HINT3
DHODH	MTRF1L
DGAT2	SRSF3
DEPDC7	MRPL18
DEPDC1B	MCM3
DEPDC1	MDN1
DCXR	RBM24
DCTPP1	RAB23
DCTN2	KHDRBS2
DCN	ASCC3
DCLRE1B	HBS1L
DCK	PEX7
DCDC2	ZBTB24
DCAF16	MRPL2
DCAF13	PRPF4B
DBN1	TTK
DBH	TENT4A
DBF4	DAP
DARS2	MRPS30
DAP3	HSPA9
DAO	MRPS27
CYP8B1	THG1L
CYP4F3	MSH3
CYP4F2	POLR3G
CYP4A11	DROSHA
CYP3A43	LMNB1
CYP3A4	SUB1
CYP39A1	FAM172A
CYP2J2	TARS
CYP2E1	RAD50
CYP2C9	NUP155
CYP2C8	NR3C1
CYP2C19	RARS
CYP2C18	H2AFY
CYP2B6	DPYSL3
CYP2A7	CSNK1A1
CYP26A1	SMC4
CYP1A2	BCL6
CYP1A1	ARL6
CYB5R1	KPNA1
CXCL2	XRN1
CXCL14	PRKAR2A
CXCL12	RPL24
CUTA	NCBP2
CUL4B	MRPL3
CUEDC1	HEMK1
CTSC	RRP9
CTSA	EIF1B
CTHRC1	NKTR
CSTF2	EIF4G1
CSRNP1	EEF1B2
CSE1L	NCL
CS	ACTR3
CRNDE	DNAJC27
CRHBP	GPD2
CREB3L2	TANC1
CPT2	EIF2B4
CPSF3	PPM1G
CPN2	IFIH1
CPN1	RPS15
CPEB3	SPTBN1
CPE	RTN4
CPD	WDR75
CP	FN1
COPS6	STAT1
COPS5	PAPOLG
COPA	CCT4
COLEC11	SF3B1
COLEC10	FHL2
COL5A2	HDLBP
COL4A2	BIRC6
COL4A1	NOL10
COL1A1	CEBPZ
COL15A1	RAB3GAP1
COG2	DARS
COCH	SRSF7
CNOT6	PNO1
CNIH4	TIA1
CNGA1	MSH6
CNDP1	FARSB
CLTA	CACYBP
CLSTN1	MRPL37
CLRN3	RPL22
CLN6	SRSF4
CLN3	CAPZA1
CLIC1	SFPQ
CLEC4M	ARHGEF2
CLEC4G	DOCK7
CLEC1B	SWT1
CKS2	MFN2
CKS1B	PLA2G4A
CKLF	RO60
CKAP4	UCHL5
CKAP2L	SRSF11
CKAP2	TTF2
CHTF18	MAP7D1
CHST4	WARS2
CHML	MRPS15
CHEK2	TSNAX
CHEK1	RPF1
CHCHD3	ERI3
CHAF1B	PRDX1
CHAF1A	NSUN4
CFP	CNN3
CFI	PRRC2C
CFHR4	PTBP2
CETP	DARS2
CEP55	UTP25
CENPW	SYF2
CENPQ	CENPF
CENPO	CD3EAP
CENPM	KMT2A
CENPL	RPS25
CENPH	KIF14
CENPF	DDX59
CEBPG	FASTKD2
CDT1	SPCS2
CDKN3	PHF3
CDKN2C	AKAP7
CDKN2B	RPN2
CDKN2AIPNL	RAB3GAP2
CDKN2A	GTF3C3
CDK5	TJP2
CDK1	RAB14
CDHR2	RBM18
CDH13	YLPM1
CDCA8	FCF1
CDCA7	SLIRP
CDCA5	EIF2B2
CDCA4	NRDE2
CDCA3	TMEM214
CDC7	FAM98A
CDC6	IFIT2
CDC45	SMNDC1
CDC37L1	GOT1
CDC25C	RCL1
CDC25A	PCMT1
CDC23	MRPS14
CDC20	TCP1
CDC123	WBP4
CDA	EXOSC8
CD81	ETF1
CD5L	KDM3B
CD58	UTP20
CD34	TMPO
CD2AP	MTERF2
CD200	TARDBP
CD1D	ZNF706
CD14	AKAP1
CD109	COIL
CCT7	PSPC1
CCT6A	TRMT1L
CCT5	ZCCHC17
CCT4	KHDRBS1
CCT2	POLR3GL
CCNF	PDS5A
CCNE1	RPL21
CCNB2	RASL11A
CCNB1	FYTTD1
CCNA2	COPA
CCL23	ZNF205
CCL21	CBX3
CCL20	ARL4A
CCDC43	MRM2
CCDC34	SMU1
CCBE1	ACO1
CBX4	CALD1
CBX3	BICC1
CBX2	RBM19
CBX1	CIT
CBLL1	DDX54
CAT	DDX39A
CASP2	TRIR
CASK	NLN
CAPRIN1	TSFM
CAPN2	RAB9B
CAPG	METTL8
CAP2	BAZ2B
CANX	AGO2
CANT1	NCOA5
CAMSAP2	VAPB
CACYBP	PLCG1
CABYR	SRSF6
CABLES2	CSE1L
CA2	STAU1
C9orf40	SNAI1
C9	ZBP1
C8orf76	FASTKD3
C8orf33	VAMP7
C8A	PAIP2B
C7orf50	MPHOSPH10
C7	IRGC
C6orf89	USP9X
C6	SNRPC
C4orf46	XPO5
C3P1	AARS2
C21orf58	RPS10
C1RL	APOBEC2
C1R	GNMT
C1QTNF1	RREB1
C1orf56	RPP40
C1orf43	NUP153
C1orf216	DEK
C1orf198	AHNAK
C1orf131	CNOT1
C17orf80	ABCC4
C17orf75	RNF113A
C17orf58	SEPT6
C12orf75	MRPS7
C11orf80	MIF4GD
C11orf54	TTF1
BZW2	GTF3C4
BUD31	DDX31
BUB3	POLR1B
BUB1B	GTF2F1
BUB1	ALKBH7
BTG3	RPL23
BTBD3	VASP
BSG	SYMPK
BRMS1	SNRPB
BPNT1	MRPS26
BPGM	HNRNPR
BOLA3	EIF2S2
BMPER	FAM83C
BLZF1	AGO3
BLVRA	TUBGCP3
BLOC1S3	PRDX5
BIRC5	PRMT1
BHMT	SBDS
BGN	TRAP1
BDH2	NSRP1
BCO2	DNAJC8
BCL9	ZNF384
BCKDHB	NUP214
BCHE	HNRNPH2
BCAP31	NXF5
BAG2	HP1BP3
B4GALT3	MACF1
B3GNT5	SMARCA4
AZIN1	ECHS1
AZGP1P1	AKAP9
AZGP1	MTERF1
AVPR1A	RASL11B
AVL9	PAICS
AURKB	TUBGCP6
AURKA	YWHAH
ATP9A	APOBEC3A
ATP8B1	APOBEC3F
ATP6V1H	CALU
ATP6V1C1	HAT1
ATP6AP1	HERC2
ATP1B3	EIF2AK4
ATP1A1	INO80
ATOH8	DUT
ATIC	MBD4
ATF3	COPB1
ATAD2	PALLD
ASS1	KIF1C
ASPM	PUS7L
ASPG	ILF3
ASPA	NGDN
ASF1B	RAB2B
ASAP1	PARP2
ARV1	RNASE1
ARPC5	TEP1
ARMC1	RPS4Y1
ARL4A	CRACR2A
ARL2	GNL3L
ARHGEF26	GADD45G
ARHGEF2	XPO7
ARHGEF11	FAM98C
AR	RPL36
AQP3	NSUN5
APOLD1	MRPL34
APOF	AFDN
APOBEC3B	FCHO1
APOA5	MAP1S
APOA1	HELZ2
APIP	ATXN10
AP3M2	PAK4
AOX1	ASS1
ANXA2	PRDM12
ANXA10	EXOSC2
ANP32E	PRRC2B
ANO10	TRIM28
ANO1	EIF2S3
ANLN	ZC3H4
ANKRD29	LRRC47
ANKRD27	ZNF317
ANGPTL6	PPAN
ANGPTL1	DNMT1
ANAPC11	ZNF426
AMDHD1	DKC1
ALPL	ZNF236
ALG6	C12orf65
ALDOA	NOL11
ALDH8A1	UBE4B
ALDH6A1	HABP4
ALDH4A1	UBA1
ALDH2	AKAP12
ALDH18A1	SYNE1
AKR7A3	CAP1
AKR1C3	MRPS25
AKR1B10	RPL27
AKIP1	ACLY
AIF1L	ANKHD1
AHCTF1	EXOC4
AGXT2	PPFIA1
AGXT	MAP1B
AGTR1	TOP2A
AGPAT1	KHDRBS3
AGFG1	ZSCAN5A
AGBL5	LLGL1
AFM	LGALS3
ADRA1A	DHX30
ADNP	NUP210
ADK	RRP8
ADH6	PTCD3
ADH1B	IMMT
ADCK2	MRPL35
ADAMTSL2	ILKAP
ADAMTS13	RAN
ADAM9	CLUH
ACTL6A	INPP5K
ACSM5	MYBBP1A
ACSM3	EEFSEC
ACSM2B	COQ3
ACSM2A	GRSF1
ACSL4	ANKRD17
ACSL1	UTP3
ACLY	UNK
ACBD3	ZRANB2
ACAT1	EIF5A
ACADSB	RIDA
ACADS	ERAL1
ACADL	NIP7
ACACB	PCNA
ACAA2	NXT1
ACAA1	POLR3F
ABL2	DAP3
ABHD12	RAB25
ABCF2	IGHMBP2
ABCC9	TOE1
ABCC4	NASP
ABCA8	CTNNBL1
ABAT	RBM38
AADAT	AP3B1
A1BG	XPO4
	RNF17
	MYH10
	MPRIP
	SPART
	TPT1
	RFC3
	SRRM1
	FAM83F
	GIMAP6
	GIMAP4
	MKRN1
	ATP13A3
	KRAS
	IPO8
	LARS
	CCDC59
	ZFC3H1
	EIF2S1
	CTIF
	MBD2
	THUMPD3
	ARL8B
	PRPF38B
	PTGFRN
	CEPT1
	PPHLN1
	ARF3
	YWHAQ
	KIDINS220
	ROCK2
	LDHA
	CDC73
	ERN2
	RPS15A
	NARS
	FBH1
	RBM17
	RERG
	RAB33A
	RBMX2
	PIWIL4
	PUM1
	YARS
	GNL2
	AGO4
	BTF3L4
	TUT4
	PRPF38A
	DSG1
	DSC1
	DHX34
	ARGLU1
	TPP2
	CARS2
	STT3A
	APC
	WDR36
	ANXA1
	TAOK3
	MSI1
	OASL
	SRPK2
	MTO1
	SYNCRIP
	NAT10
	CAPRIN1
	CDK4
	ESPL1
	ZC3H10
	HNRNPA1
	LTV1
	SMPD2
	CCT7
	MDM2
	MPHOSPH6
	DYNC1LI2
	FHOD1
	URB2
	NTPCR
	RNASEL
	DHX9
	CEP350
	RC3H1
	MRPL44
	EIF4E2
	GCC2
	MRPS9
	CKAP4
	FLNB
	RNASEH2B
	CKAP2
	TBC1D4
	LMO7
	LCP1
	SETDB2
	IGF2BP3
	NUPL2
	BZW2
	TBRG4
	DDX56
	DBNL
	IREB2
	NMT1
	SRSF1
	TACO1
	MRPL47
	TRA2B
	EPRS
	SMPD4
	WDR33
	DNAJC1
	CDK9
	TXN
	ODF2
	ECPAS
	SMC2
	FAM129B
	STXBP1
	CDK5RAP2
	PRPF4
	TEX10
	MRPL50
	NR5A1
	NCBP1
	ANP32B
	RPL35
	ENPP2
	RANBP6
	POLR1E
	PLAA
	UBAP2
	APTX
	TLN1
	HINT2
	RPS6
	CMTR1
	MDC1
	CPEB2
	NUMA1
	RAB30
	NARS2
	MRPL15
	TGS1
	DDX60
	BUD13
	RDX
	PPP2R1B
	ALKBH8
	SLTM
	MAPKBP1
	NUSAP1
	KIF23
	RTF1
	PARP6
	RPLP1
	RSL24D1
	GTF2B
	IFI44L
	RTCA
	HADHB
	PNPT1
	THUMPD2
	RAB1A
	PREB
	LRPPRC
	MYOF
	KIF11
	ARL3
	CEP55
	DBR1
	DNAJC13
	ANXA7
	ASCC1
	RPS24
	ATIC
	SMARCAL1
	METTL5
	SSB
	PPIG
	FASTKD1
	OLA1
	ITPRID2
	USP8
	SECISBP2L
	PARP16
	HERC5
	COPS4
	HNRNPD
	SEC31A
	LARP1B
	PRDM5
	G3BP2
	SEPT11
	CNOT6L
	USO1
	ANXA3
	CENPE
	GSTCD
	PAPSS1
	SEC24B
	YARS2
	ETFBKMT
	ZCRB1
	SCAF11
	LLPH
	POC1B
	SNRPF
	TARBP2
	NABP2
	SMARCC2
	C12orf10
	ESYT1
	HNRNPA1L2
	SBNO1
	SETD1B
	DENR
	RBM26
	SRRM4
	MBNL2
	RNF113B
	NOVA1
	RAB15
	WARS
	MFAP1
	SRP14
	ANP32A
	ETFA
	SCAPER
	WDR61
	PML
	CELF6
	FANCI
	UNC45A
	IQGAP1
	EFL1
	SEPT12
	PARN
	FTO
	DHX38
	ZFHX3
	ZCCHC14
	ADAD2
	RPL3L
	RPS2
	TCF25
	NCOR1
	COPS3
	MYOCD
	UTP4
	NOB1
	NPEPPS
	CLTC
	PTRH2
	RPRD1A
	C18orf21
	ASXL3
	PELP1
	ARHGDIA
	EIF4A3
	TBCD
	RPTOR
	CEP131
	ELAC1
	MBD1
	ZCCHC2
	BRD4
	DUS3L
	HUNK
	SCYL1
	URB1
	SAE1
	GEMIN7
	CARM1
	RPS11
	RPL13A
	NOSIP
	PGD
	RPL11
	ZNF593
	SERBP1
	RPS8
	KIF2C
	ALDH9A1
	MAEL
	MRPL24
	ISG20L2
	HDGF
	SF3B4
	ZNF687
	TARS2
	SETDB1
	ANP32E
	MRPL9
	POGZ
	EIF2D
	TP53BP2
	RAB13
	UBAP2L
	GATAD2B
	ILF2
	INTS3
	C1orf131
	GALNT2
	CEP170
	ACP1
	SRP9
	NVL
	SDE2
	ARF1
	CDC42BPA
	C1orf35
	PARP1
	LBR
	ARL8A
	PDIA6
	HNRNPLL
	EML4
	RPS27A
	ASXL2
	SNRPG
	SNRNP200
	MRPS5
	DQX1
	DUSP11
	RABL2A
	ZC3H8
	AFF3
	POLR2D
	ZNF385B
	HSPD1
	DIS3L2
	FANCD2
	RAB5A
	DYNC1LI1
	RBMS3
	RPL32
	PTPRG
	SHQ1
	LIMD1
	RABL3
	SRPRB
	EIF2A
	LPP
	DCAF1
	MANF
	EIF2B5
	FIP1L1
	LYAR
	TRMT10A
	PYURF
	METTL14
	NAF1
	RPS3A
	RPL37
	DDX46
	G3BP1
	NHP2
	FARS2
	ZMAT2
	ABT1
	PPP1R18
	PRIM2
	RPL7L1
	PHIP
	RARS2
	PNLDC1
	ZMYM4
	C7orf50
	PURB
	MDH2
	CCT6A
	MEPCE
	NOM1
	NCAPG2
	LUC7L2
	MSN
	ZMYM3
	NONO
	OGT
	NXF3
	RADX
	RBMX
	ZNF185
	RPL10
	PLPBP
	MRPS28
	LACTB2
	RPL7
	MTDH
	POLR2K
	EIF3H
	UTP23
	FAM83A
	CDKN2A
	ZCCHC7
	MRRF
	SURF2
	SURF6
	REXO4
	RPL7A
	CIZ1
	SEC16A
	PARD3
	ZEB1
	A1CF
	POLR3A
	RPP30
	FRA10AC1
	EIF4EBP2
	MKI67
	MTG1
	PPRC1
	PDCD11
	TUT1
	TNKS1BP1
	SSRP1
	PTPRJ
	CELF1
	ENDOD1
	SERPINH1
	RPS3
	ZC3H12C
	ATM
	AASDHPPT
	HYOU1
	MTA2
	CPSF7
	SIDT2
	TAGLN
	LSM14B
	YTHDF1
	TRPT1
	PLCB3
	MRPL49
	FAU
	ALDOA
	HIRIP3
	ITGB1
	CWC15
	SAP18
	PDCD4
	CCT5
	DLAT
	PIH1D2
	DHX37
	UBC
	NOCT
	DCP1B
	TWF1
	EIF4E
	SRFBP1
	UPF2
	NCAPD3
	QTRT2
	KIN
	ZNF385D
	GUF1
	SACS
	PABPC3
	PARP8
	DST
	TIAL1
	BAG3
	RBM46
	GPATCH11
	GEMIN6
	ARL11
	ATP5F1A
	C18orf25
	UHMK1
	CWF19L2
	BOLL
	RPP38
	ZFP36L2
	MBNL1
	DDX4
	PELO
	SAR1B
	IFIT5
	HNRNPDL
	UTRN
	PLOD2
	ZIC1
	SRP19
	CARHSP1
	ANAPC1
	CAST
	CLGN
	SMARCA5
	HNRNPU
	RANBP2
	AHCTF1
	RBMS1
	CFDP1
	TRIP12
	SREK1
	CHD1
	MSI2
	ENPP3
	MIA3
	ENAH
	BUB3
	SRSF12
	MRPL39
	TSEN2
	RAB6B
	SEPT14
	MMS19
	TRMT44
	MOV10
	SLC16A1
	HEATR3
	NIFK
	LARP1
	CNOT8
	NUP205
	RBM45
	TTN
	PDIA4
	RNF20
	PPARGC1B
	LSM11
	RRAGA
	RAB39B
	AFF2
	N6AMT1
	CCT8
	SCAF4
	TDRD9
	MTERF3
	RPL30
	SUPV3L1
	EEF1A1
	HK1
	PHF6
	UTP14A
	ATAD2
	ZIC3
	MALSU1
	EIF4A2
	BRPF1
	RPUSD3
	EXOG
	SMG1
	RBPMS
	DDX19B
	MYO1E
	MRPL17
	MRAS
	WASF2
	TENT5B
	CUL4B
	HIST1H4H
	EIF5B
	CNOT11
	TSR2
	ZC3H18
	TAGLN2
	DUSP23
	NPM2
	CCAR2
	SYNJ1
	MRPL10
	GART
	SON
	CSRP1
	IGF2BP1
	PSMD4
	HK2
	CELF3
	NAE1
	ZYX
	ZNF233
	ZNF235
	CALM3
	ATAD3B
	SSU72
	NDUFV3
	CBS
	U2AF1
	RRP1B
	G6PD
	CSTB
	RRP1
	FAM207A
	MCM3AP
	PCNT
	PRMT2
	SAFB
	CHTOP
	ADAR
	FDPS
	LMNA
	CCDC12
	GPATCH4
	AZGP1
	CPSF4
	TONSL
	RECQL4
	SQSTM1
	RPL8
	PSMC2
	CELF5
	ABCF3
	U2AF1L4
	SRSF2
	ALDH16A1
	DCD
	ZNF385A
	LSM12
	RACGAP1
	LARP4
	RAVER1
	BCL6B
	SENP3
	EIF4A1
	RPL26
	POLR3K
	FLYWCH2
	NXF1
	RPL29
	RPS6KA4
	ELAVL4
	MAGOH
	PARS2
	USP24
	NOL9
	RAVER2
	PEF1
	RBBP4
	FUBP1
	TYW3
	C1orf52
	ZNF326
	HFM1
	GFI1
	AGL
	RBM15
	TDRD5
	TFB2M
	CAPN2
	MRPL55
	WDR26
	ARL5A
	NUP35
	SMARCAD1
	PDLIM5
	RPRD2
	ERCC3
	IWS1
	DHX57
	S100A9
	TDRD10
	HELQ
	MRPS18C
	ATP1A1
	EIF4E3
	CCT3
	NEK10
	CIP2A
	CWC22
	ANKZF1
	CLASP2
	NUAK2
	IFI16
	EIF5A2
	RPL22L1
	RYBP
	GTPBP8
	NEPRO
	WDFY3
	THOC7
	PSMD6
	GMPS
	TIPARP
	SLMAP
	RPL9
	RPP14
	DNASE1L3
	RBM47
	U2SURP
	TOPBP1
	SLC4A1AP
	KIF15
	WDR43
	FYCO1
	ZC3H12A
	POLR2H
	RPN1
	RFC4
	RPL39L
	TKT
	GNL3
	PBRM1
	TASOR
	SLBP
	AIMP1
	METAP1
	APEH
	HSPA4L
	RAD54L2
	POC1A
	HMGB2
	ANXA5
	ADAD1
	NAA15
	ICE1
	ABCE1
	OTUD4
	LSM6
	NIPBL
	AGGF1
	TENT2
	UTP15
	NSA2
	GFM2
	TERT
	SEPT8
[truncated: 962 more rows]

## Sheet: Sup table S2
DEGs
RPL29
RPL15
RPS14
UBA52
RPL7
RPL38
RPL27A
RPS23
HSPBP1
RPL34
RPL41
EXOSC5
PRMT1
ADSL
CLIC1
ZNF524
PTOV1
CNIH4
ERCC2
TPD52L2
EIF3E
CLTA
YDJC
ATIC
HM13
WDR46
GADD45GIP1
NAT9
IPO4
TOMM20
RRP9
UBE2S
SNF8
PAFAH1B3
GRWD1
PPIA
COMMD6
SAC3D1
TUSC2
ILF2
PPIL1
ARPC4
TXNL4A
AHCY
CDKN2AIPNL
EEF1A1
SMYD5
BANF1
TIMM13
ANAPC11
CCDC61
TUBB
PSMD4
EMG1
CCDC97
NAA10
TRMT61A
BOLA3
RNF7
OLA1
CKS2
BIRC5
GGCT
PUS1
CPSF4
ISY1
CCDC12
TRMT1
XPO5
NME6
ZDHHC16
NAT14
PTRH2
DDX56
BCL7C
PSMB4
NSUN5
MBOAT7
DHX34
ARFGAP1
SRSF3
STK25
GLRX3
EIF5B
B4GALT2
LRRC61
ZNF416
SLC25A39
PIGC
PIGU
PWP1
EHMT2
TMEM141
NFKBIL1
HRAS
EIF4B
RRP1
TMEM223
ANP32A
AURKB
PELP1
NUP37
RNASEH2C
LSM5
ETV2
SAP30BP
SPC25
OXA1L
MAD2L1BP
TSSC4
CHKA
CBX3
GNL3
DDX39A
RAE1
TYSND1
MARCKS
SMUG1
CYP2C8
CERS5
RNF220
FAM189B
C12orf73
CBY1
NDRG3
TRMT2A
HSF1
PDAP1
POLL
KHDRBS1
NCLN
KDM1A
VDAC2
ARFRP1
DPH5
FKBP4
ECE2
CDC26
AP4M1
LBR
FBXW9
CDCA3
BMF
TPRN
ZNF574
C8orf33
EGLN2
EXOSC3
AHSA1
FHL3
RCC1
PAK4
SRP14
TMEM161A
RBM3
CENPB
MFF
WDR77
FGFR4
C6
RABGGTB
ZNF420
MBD3
EFTUD2
UBE2Z
NDUFB2
GEMIN6
NT5DC2
ITGB1BP1
LSM14A
VOPP1
DEPDC1B
HJURP
CIZ1
TOR3A
ZNF512
EIF5A
PCBP2
CHEK1
GINS1
NUDCD1
RECQL4
TRIP13
TBC1D22A
MTCH1
UNC119B
TBL2
LMAN2L
TRAPPC1
RABGEF1
ENTPD6
HDDC3
HIC2
RACGAP1
UBL4A
OIP5
MRPL55
ATP6AP1
VPS28
POLDIP3
EXOC6
B9D2
GPANK1
NCBP2
CHCHD7
SYS1
ZNF260
ASF1B
LRPPRC
SLC39A1
SEPHS1
UBE2R2
LAPTM4B
EIF2A
MMS19
COX7C
NPC2
UQCRFS1
MAPRE1
CDC25A
ACSM5
ZNF428
CYHR1
MAGED1
VRK1
ZNF134
SGCE
CDCA8
KIF20A
HDAC5
DKK1
STARD3NL
CENPO
NCAPD2
CDC45
CANT1
CDC42EP1
THADA
ABHD12
MRPL50
NUP85
TK1
LAMTOR2
MRPL22
TRAIP
MRPL2
TRAPPC2L
IMP3
MFSD2A
TDO2
PSMA4
NDUFA6
ALG8
PSMA7
GAL3ST1
SSR3
RAD51C
KIF4A
BTF3L4
ZNF552
ATG9A
PPOX
ZNF74
SERTAD3
SOX12
TIMM10
PCK1
ZWILCH
ACADL
UBQLN4
BUB1
NARF
YWHAE
NDC80
TMEM11
IDH3B
CENPF
G6PD
HINT1
DPH3
ATP6V1E1
ARMC7
PRIM2
MCM4
IFNGR2
ZNF358
DDX1
BORA
DNAJB2
CDCA7
ARMC10
CNDP1
RFC2
GPC3
GATC
GORASP2
GDI2
PDSS1
TOMM40L
MSTO1
DYRK1B
DENR
CD276
FANCI
VPS26A
TXNDC9
STT3A
WDR4
ANXA2
CDC6
SNX8
MOB4
CMTM3
LETMD1
SRPK1
WDR34
PPARGC1A
SERPINB1
PRC1
RTN4IP1
SHKBP1
POLE4
RABIF
GINS2
CMTM7
CPSF1
TUBA1C
IER3IP1
C1orf216
RHBDD3
AIFM2
TRMT12
POLD2
PKIB
COMMD2
CLDND2
DNMT3B
MSH2
RAB11A
ZNF146
SRD5A3
CCNF
ARL16
TXNDC12
E2F1
TDP2
SPCS1
AMD1
YWHAH
ZNF124
PIGZ
MTHFD1L
ACACB
HSD17B6
KLHL23
PTBP3
NUP155
TRIM59
PACSIN3
PSME3
PCMT1
DMGDH
TESC
NECAB3
PPT1
ALPL
ADCK2
LRRC14
PGP
PYCR1
UBE2Q1
HSP90AA1
ERCC6L
NFKBIE
MEGF8
PROZ
BRCA1
CCHCR1
KCTD6
ORC1
MCM8
SPIRE2
TMEM184B
CENPL
TTLL12
BTBD3
CBX2
ORC6
SLC28A1
SOX9
WSB2
ZNF607
POLA2
STIL
TM4SF1
GDA
TMED3
ATP2B1
SLC27A2
TEAD2
HSD11B2
SMARCA2
ACSL4
KCTD17
GLS2
ABHD2
GAS6
VIL1
NUP205
SRC
CYP2C9
PKMYT1
ITM2C
RRM1
RNF43
PM20D2
FGFR3
ACMSD
AASS
ALDH8A1
RDH16
AR
C9
PAPSS1
FGGY
SLC1A4
RAB3D
CHST10
PFKFB4
NLRP6
CES2
CYP4A11
MBNL3
PPP1R16A
E2F8
HS6ST2
SNAP25
SIVA1
TTYH1
RAD21
GNG4
TDRKH
RAD54L
BHMT2
TMEM132A
INHBC
GABRD
CPD
SLC25A5
ALDOB
PLAG1
FBXO43
PRTFDC1
SLC6A8
CAPG
SORL1
GPT2
ZNF880
GNAS
FERMT1
AFM
FCN2
DPYS
TYRO3
RAB11FIP4
PPP1R9A
ADH1B
HEY1
ABCD1
TP53I3
MYCN
C1orf112
ALDH6A1
LYPD1
ZFP36
TP53
KCNE3
MYADM
ZNF28
PTP4A3
PINK1
GBP1
TMEM182
TSPAN3
PLCB1
FRAS1
TRPC1
COL2A1
MAP7D2
FAM83D
APOA5
DCDC2
SEC14L2
SEZ6
BAAT
SLC17A5
TCEAL8
MMAB
IGF2BP2
GBP3
ALCAM
ZNF300
CCNJ
XRCC2
SLC29A2
NAALADL1
NCAPG2
BCAT1
PLCH2
TSPAN7
AGXT
AADAT
GRAMD1A
PIK3C2G
FKBP10
C8B
PAQR8
PCK2
B3GALNT1
CYP39A1
LINGO1
LOXL4
TSC22D3
BDH1
TMOD1
THY1
F13B
HMGCR
ANGPTL4
SLCO1B1
HMMR
C12orf56
ATP1B3
TUBA1B
SPAG5
TSPO
NPBWR1
CPS1
TMSB4X
SULT1C2
CYP4F3
GPT
APOL1
MBOAT1
TFF3
FOXJ1
CTSC
MANEAL
IL17RE
ENC1
SLCO2B1
ADM2
MYRIP
CYP2C18
RELN
APOL3
RCOR2
SEMA7A
ADAMTSL2
LGR5
FOLR1
SOAT2
MRAP2
ADRB2
SLC30A3
TNNI2
ASPG
INMT
TSPAN15
SPATA18
SCARA3
PROS1
MTHFD1
GCGR
MDFI
SOSTDC1
CYP2C19
CD7
TGFB1
MAT1A
MGLL
FBLIM1
ARRDC4
SLC38A1
FAM111B
FCER1G
CNTN3
LHFPL4
SOD2
IDO2
SELENBP1
GXYLT2
ST14
REEP6
TFR2
MASP1
ACY3
DKK4
RHOBTB1
GAD1
FXYD3
NTS
MEP1A
VSNL1
FCGBP
AOX1
LCAT
CPLX2
GREM2
SLC17A4
DPT
LEPR
MFAP4
DACT2
C9orf152
ANKRD65
SPOCK1
LUM
DSG2
EFEMP1
EGR1
C1orf116
UROC1
NDN
A1BG
FBLN2
BBOX1
LBP
IGFALS
DIO1
AXIN2
ETNK2
EPO
FAM133A
SPINT1
AEBP1
BCHE
HGFAC
SLPI
C6orf223
MTTP
SLC2A2
GC
SPINT2
PODXL2
TTR
ITIH1
GPR88
RPS5
RPL18
RPLP0
RPS16
RPS19
RPS3
RPS18
RPS10
RPL6
FBL
RPS21
RPL32
RPL10A
RPS9
RPS27A
ZNF581
RPL37A
RPL31
RPS7
RPL27
RPL23A
RPS17
RPL35
IMPDH2
RPL24
RPS24
RPL39
RPL14
RPS8
RPL37
RPL36A
RPL35A
SNRPD2
RPS12
RPS11
RPL19
RPL8
RPL36
RPLP2
RPL3
RPS27
RPS4X
RPS29
RPS6
RPS25
RPL30
RPL9
TRIM28
RPL12
RPL11
RPS15A
RPS28
BCL2L12
RPS15
NOSIP
GAS5
GEMIN7
EIF3D
EIF3F
SNRPE
RPLP1
LSM2
NACA
RUVBL2
ROMO1
ATP5G2
ZNRD1
TIMM9
SNRPB
EIF6
GLTSCR2
LSM7
PFDN5
PDCD2L
TFPT
EIF3B
OST4
NME1
PRPF31
NR2C2AP
RFXANK
TMEM101
SNRPF
PPP2R1A
TIMM50
TMEM147
RBM42
MRPL11
POLR2H
SNRPD1
LYRM4
FAU
UBE2M
NLE1
PES1
KDELR1
NPM3
MRPS12
PFDN4
SF3B5
NXT1
TSEN34
EIF3K
PDRG1
SEC61G
SSR2
SNRPG
C19orf53
ITPA
C6orf48
SNRPC
RPL22
POLR2I
URM1
ERCC1
C20orf27
NAP1L1
IGBP1
PDCD5
ZNF787
ATP5SL
UBXN1
NMB
REXO4
MRPL14
COX6B1
BAX
TOMM40
MZT2B
CHCHD1
DTYMK
PIH1D1
TPRKB
TOMM22
CNPY2
LINC00493
JMJD4
CCDC167
DDX49
RPL22L1
PPP1R14B
DYNLRB1
SNRPA
EPB41L4A-AS1
KPTN
EIF3H
RANBP1
ATP5E
ERGIC3
CSNK2B
C18orf21
TLCD1
PABPC1
VPS72
POLR2J
NDUFB11
MKKS
DRG1
NEDD8
SAE1
BZW2
MRPL51
EEF1D
LSM4
SLIRP
POP7
SDHAF1
CDK7
METTL5
POLR2G
SNRPB2
KLHDC3
PGLS
SNRPD3
C8orf59
TRMT112
MANBAL
NOL7
PA2G4
SEC11A
DYNLL1
EXOSC4
RALY
TOMM5
EIF2S2
NPM1
BRK1
CD320
EIF3M
SSSCA1
PSENEN
XRCC6
ANP32B
POLD1
NDUFA3
C12orf10
UFC1
BYSL
PTTG1
RPS19BP1
EIF3G
CDC20
EXOSC1
BTF3
COMMD7
RNF181
AP2S1
C14orf2
FARSB
HNRNPA1
STOML2
UBE2C
HN1
MRPL52
MARCKSL1
PRPF6
PQBP1
RBMX2
POLR1C
MCRS1
MEA1
NT5C
C14orf166
TIMM8B
H2AFX
RSL24D1
DNTTIP1
SSNA1
RBX1
CPNE1
CSE1L
ARL2
ERH
EXOSC7
CCT7
PTRHD1
MRPL33
MRPL17
RRP7A
BRMS1
ATP5J2
UBL5
ARPC1A
SURF2
SUPT4H1
APOPT1
COPE
NDUFA13
RBM8A
CCT4
SRPRB
NUDT1
SS18L2
DCTPP1
TTLL4
SURF6
FBXO46
PPP1CA
RPF2
SDHAF2
EEF1E1
ZNF473
PSMB5
MYL6B
DAD1
CHMP2A
DGUOK
NENF
PSMG3
FLVCR1
BCAP31
NOP10
KRTCAP2
SAAL1
AKT1S1
CHCHD2
ABT1
PPM1G
SMARCB1
TMEM126A
COPZ1
MRPS23
SSBP1
C12orf57
CDCA4
CENPM
MRPS26
TGIF2
CCNB1
NSA2
TBCB
TAF10
CKLF
LYPLA2
C1orf35
CDC123
ARPC3
UBE2L3
BLOC1S3
MRPL47
TAF1D
USMG5
C14orf119
PPP1R35
CCDC124
QPCTL
SLC25A6
HMGA1
SLC35D2
BABAM1
MRPS21
NHP2
CDKN3
MAF1
ZMAT5
GTF3C5
USE1
BOD1
THOC5
APEX1
PRELID1
SRM
NDUFAF2
CENPW
ZNF576
PPIH
SSB
EIF2B4
RP9
EIF4E2
GTF3C6
MRTO4
FKBP8
LENG1
NFU1
SSBP4
DPM2
PSMD8
SFXN4
MRPL45
PHF5A
RPP30
JAGN1
ORMDL2
MCM7
RPIA
TTC27
DRAP1
UBA2
MRPL21
CKS1B
JTB
THOC7
PHB
GSK3A
RAN
LSM3
NDUFB7
PDCD2
CCT6A
VPS25
ARPC5L
MAP2K2
TBRG4
HDAC11
MFSD5
MRPL30
CCDC137
CCT2
SUPT5H
COPS6
SSR4
PHB2
RRP36
TBC1D13
DPCD
EFNA4
FAM32A
ZNF444
ZCCHC3
IMP4
PFN1
C1QBP
SNX5
SCAMP3
NDUFB9
HDGF
DCUN1D5
BUD31
LAMTOR1
CCNB2
TIMM17B
PRCC
POP4
DEDD2
ZNF784
CDK4
MRPL10
PMF1
SMYD3
METTL1
ZNHIT3
POLR3C
PDCD11
PARL
PSMC4
SDF2
DAZAP1
POP5
ZNF766
PEG10
CWF19L1
FRAT2
NRBP1
SENP3
WDYHV1
TMEM216
NCAPH2
CDT1
IRF2BP1
GAPDH
WDR5
NAT10
MRPS2
AUP1
CNOT10
TMSB10
BCCIP
FIZ1
RIOK1
PTGES2
HDAC1
MRPL9
CLNS1A
SCAND1
ZSCAN2
CDCA5
ALG3
GPN1
MRPL48
NDUFA11
HSPE1
NANS
RNF113A
PSMB3
DNMT3A
RNASEH2A
PPP1CC
CSNK2A1
TMED9
FAM207A
FARSA
BRIX1
GPATCH4
MYPOP
SMAGP
NDUFS3
RARS
COMMD5
RAC1
MRPL13
MRPL43
CHMP4B
TMEM115
TRIM11
MRPS16
CPSF3
KIF2C
RPL36AL
POLR1D
ZMYND19
UBL7
MYBL2
C7orf50
GMNN
HDAC2
CAPNS1
PKN1
SHARPIN
WRAP53
AFP
PTDSS2
RALA
CACYBP
CUTA
PYGO2
UBE2T
CCT8
LYAR
MRPL23
ATP5L
NR2F6
PHPT1
MED22
ANAPC7
IRF3
NOL11
EID2
H2AFZ
DUSP12
GAR1
C11orf74
HSP90AB1
SLC41A3
C21orf59
RPP40
GNPAT
LRRC1
C9orf69
IMMP1L
ARF5
PRR3
TMEM14B
COX7A2L
NCL
YIPF3
TRAPPC6A
B4GALT3
VPS33A
MIS18A
DCAF13
CDK1
RSL1D1
KRT10
TMEM9
MRPS17
MTA3
NOB1
ZBTB45
HSCB
ALDH18A1
POLR2D
NUP62
KPNA2
TAT
EIF4A3
ATF4
C2orf68
VARS
DNAL4
ERAL1
RFC4
TUBB4B
PCBP4
CEP89
NONO
NOP58
SNX17
PUF60
JOSD2
TRMT6
ATP5G1
GPAA1
TSEN54
UTP18
CHCHD5
C12orf45
SMARCC1
YBX1
TXNDC17
ANKRD54
MED30
SET
RANGAP1
CRNKL1
ZCCHC17
CFL1
NVL
RRP12
TPI1
BAK1
ZNF579
LMNB2
TROAP
TTK
PFDN2
C3P1
UTP14A
UXS1
MRPS14
PRR11
C8orf76
MRPL27
NDUFA12
TMEM60
TMEM160
TARBP2
HMGN1
SLC1A1
EDF1
TOP1MT
FTL
SF3A2
SLC22A1
NOP2
MARK4
SYNGR2
UFD1L
HAO2
ZFAND2A
HNRNPL
MED27
ZDHHC12
UQCRB
B3GALT6
RNF25
SMPD2
LAGE3
SERGEF
COMMD3
WDR75
IRGQ
PSMB1
RRP15
USF1
SMG5
DPY30
SUV39H2
ZNF622
FLAD1
TMEM91
ZNF526
SNAPIN
EDC3
PAK1IP1
HTRA2
TUBD1
ZWINT
GHR
PTGES3
PGAP2
KIF11
YKT6
GARS
ZNF32
BRI3
HSPB1
WDR12
ARFIP2
TMEM203
DSCC1
BEND3
HDDC2
GNG5
EIF2D
RPN2
PRR13
CAD
ZFAND2B
MEX3A
EIF1B
NEK2
ATP5O
YIF1A
NDUFB3
NDUFA7
NDUFS6
TP53RK
PUSL1
RPUSD3
FANCG
MCAT
MEST
MITD1
TATDN1
PSMB7
COMMD4
ASB1
POLR2L
MDK
TSN
DNAJC2
FABP5
NOP16
HIGD2A
NAA38
SLC46A3
AIP
ENPEP
SPATA24
DLGAP5
GTPBP4
STX10
SWI5
UQCR10
CHRAC1
CINP
TIGD1
MPZL1
FUNDC2
MCM5
C9orf40
PRR7
FEN1
GYG1
CD3EAP
SPRN
MAVS
NUP133
ZNF614
POLE3
UBE2E1
MFSD10
SLC25A1
SNRNP40
STRN4
FLOT1
SSRP1
LCMT1
C19orf70
UBE2D2
PRDX5
FAM58A
SEC61B
STRBP
MRPL24
EDEM2
RP9P
AATF
DDA1
FUNDC1
INTS8
ILF3
DAXX
LEMD2
KIAA0930
DUSP9
DNAJC5
PPP4C
ENSA
CKAP4
ACD
NEU1
COIL
OSTC
VAT1
SMG9
ZBTB8OS
YIF1B
MRPS33
RFWD2
FAM89B
RHOG
RWDD1
STIP1
CAMLG
TRIAP1
DDAH2
IPO5
ZNF580
C11orf68
TCF3
TBC1D7
DPM3
SLC39A7
IFT52
NOA1
SNRPA1
SKA3
MCTS1
WDR18
MRPS18A
OAZ1
DNAJB11
DLK2
KIFC1
CYP8B1
DBF4
HIF1AN
TRIM71
SIRT6
SARS2
MORN2
PIN4
TMEM14C
EXOSC8
TPX2
PRIM1
HAUS1
PTMA
SPC24
ZNF692
ACOT8
MCM3
ZNF329
ARID3A
LZTS2
NUF2
GBA3
ZNF544
SEC13
ENY2
PSMD13
PRPF19
EIF3I
NCAPG
PPARG
TMEM69
B9D1
YWHAZ
FKBPL
SPCS2
ZNF780A
GYS2
MRPL12
ARPC2
EIF1
HNRNPA3
GTF2H5
AGPAT1
MAGOHB
NDUFB8
SLC10A3
RUVBL1
NUDT2
IKBKAP
TXN2
ZSWIM1
SDCCAG3
SREK1IP1
RRS1
NUDT17
SLC10A1
TIMM22
THAP8
MZT1
POLR3F
HSBP1
METTL18
EZH2
TRMU
SPPL3
TSG101
RRM2
MMP11
EXOSC2
RAD51
PSRC1
NRM
C1orf131
HNRNPA0
XRCC1
SAMD1
ZNF233
PLK1
BCAM
ACP1
ZNF284
MIIP
PHOSPHO2
POLR2K
THAP11
QTRT1
PATZ1
PPIB
COX19
SUB1
BRAT1
GIPC1
UCHL3
CETN2
ERI3
ATP5H
MRPS7
STARD7
CREB3
GTF3A
MAMSTR
COX16
TRIM65
C19orf43
VASP
SNAPC2
FIBP
GTSE1
METTL23
NDUFAF4
C19orf24
TTC36
UXT
CD63
VPS54
CENPH
KARS
PPA1
SAR1A
ETV4
RPA3
BUB3
TMEM106C
C12orf49
MTFP1
HMBS
ISG20L2
FKBP11
SFT2D1
TAF11
MAD2L1
STMN1
CENPA
COX5B
FKBP3
TIGD5
SMS
SKA2
EFNA3
METTL2B
BTBD2
SEC11C
AP2M1
MED8
NTPCR
RANGRF
MCM2
MRPS35
ACSL1
PBK
SPATS2
ZSCAN16
THOC6
CHMP4C
NDUFA8
POC1A
CCDC86
CTDSPL
DDX50
PSMG4
SND1
C7orf73
CTDNEP1
SKA1
PRKAG2
ZNF530
PLAGL2
SDS
RCC2
TMUB1
TTLL1
TCOF1
RNF149
RFT1
UBAP2
MYL6
BLOC1S1
ZNF749
NDUFA9
ZBTB34
SDF2L1
HSPD1
TRIM22
GTF2A2
CRIPT
C16orf45
C9orf16
HAX1
NIP7
CCDC34
CEP55
NSMCE2
FAM200A
MED28
LSM11
BUB1B
SLC25A3
SUV39H1
ZNF71
HIRA
GEMIN2
FAM103A1
SPSB2
COPS3
ZNF775
STRAP
CS
FUCA2
TBCC
NDUFA4
SLC12A9
CBX1
PRPF4
COX7A2
TRIM24
ZNF529
STXBP6
ASPM
RIPK2
FAM71E1
FAM60A
TIMM23
GPD1
TKT
ABAT
PSMB6
ZNF256
TXN
LIG1
ADNP
DPH2
EID2B
ACTL6A
SUMO3
CCDC6
CHEK2
MELK
NFYA
ZNF706
MRPL18
P2RX4
ISOC2
MANF
UROS
CYP2A7
EEF2
APH1A
MIEN1
PUS7
KCTD2
HELLS
PPP1R37
UQCR11
S100A13
STAG3L4
SLC44A3
NDUFA2
ORAI1
CCDC58
TMEM42
CCT5
ATP5C1
C8A
APRT
AURKA
SMARCA4
SMARCD1
C6orf1
MED20
GMPS
RBM15B
SLC35B1
XAF1
SUMO1
SMOX
SNHG10
TOP2A
YIPF2
CSTB
RABAC1
PRKCD
COX8A
NR1I2
C1S
F11
PCNA
IGSF1
DDOST
HES6
MED10
GGPS1
CYC1
MRPL20
ZNF593
MRPL36
H2AFY2
STX6
TMEM150A
NSDHL
CXCL2
COPS5
ZNF222
TRIM27
TRAF2
ANXA11
SERPINI1
EIF2AK1
DCTN5
WDR43
WBSCR22
YEATS4
C3orf33
LMNA
ACVR2B
ZNF850
DAP3
KIF15
INTS7
MRPS15
MMD
GAS2L3
GSTO2
GLYATL1
ARL3
PDLIM1
HNRNPUL2
FBXL6
KIAA1522
COX6C
ZNF419
MAGED2
COX5A
GADD45A
POLE2
MCM6
CDK16
YBEY
XRCC5
TACC3
UBE2Q2
NAE1
H2AFJ
PHYHD1
CDCA2
CENPV
ZNF551
XDH
SERPINH1
KIAA1429
SAMD10
ZNF121
NDUFS4
PNMA1
PSMG2
DVL2
EPRS
MPDZ
TOMM34
H3F3A
PSPH
YWHAQ
ARHGAP19
RCN2
ZNF480
GLO1
G6PC3
MRPS10
EXO1
ATP5I
FAM49B
WDR62
BSG
ACSM2A
ITGB3BP
TNNC1
DTL
CENPQ
MTMR2
C1orf43
SFR1
ROBO1
KRT8
ALKBH2
ETFDH
TARBP1
C4orf46
RPUSD1
NEURL2
HIST1H4J
DBN1
ZNF404
ANLN
THRSP
COG2
NDUFA4L2
SCO2
PTGDR2
TMEM237
CDC25C
ZNF296
CYP4V2
MRPS34
ILVBL
FAM96B
AP1S1
SF3B4
GNB2
FLVCR1-AS1
HPDL
HAT1
CTPS2
FBP1
COX6A1
DYNLT1
VAMP8
NUSAP1
FAM206A
NDRG1
HN1L
SSR1
C11orf49
WDHD1
IGF2BP1
TYMS
MPV17
FOXM1
CDC42EP2
PARP1
SOX4
TTC13
CCDC138
CHD1L
ACP6
POMP
ATP6V0B
HMGB2
PPCDC
LGALSL
BCAS4
TUBG1
NANP
TONSL
MRPL15
TMEM86B
C17orf53
VBP1
MAP4K4
SNHG4
FANCD2
SKP2
C1GALT1
PDZD11
ZNHIT2
PYCRL
HSPA14
SCP2
CFHR4
KIF23
FAM175A
UBE2N
ARL6IP6
PRDX4
NCAPH
PIGS
LIN9
HSD11B1
EME1
GLA
FIS1
ASNS
MKI67
ORC5
AGBL5
DBI
SNX12
ODC1
AGPS
UBE2D1
SCRIB
NDUFB1
NAT2
STYXL1
PHF19
KIF18A
MSRB2
ETFB
CTNNAL1
MAP3K5
C16orf59
KLKB1
GOLT1B
TOX3
FOXA3
MAN1C1
TMEM206
MINOS1
CNPY4
MVD
RPA2
UNG
BAMBI
MYL12B
MND1
ADRA1B
FOXK1
HIST1H4D
INSIG1
KBTBD6
BLM
MCM10
KIF18B
NUP107
E2F5
ZC3H13
WASF1
TRNP1
HSPB11
ABCB4
PPAT
RMI2
C5orf34
MPST
BEX2
TRIP6
SQLE
CYP2B6
DTNBP1
CKAP2L
SPHK1
RNF5
ZNF600
KIF22
FAM3B
RAD51AP1
IPO7
NDUFA1
CCNE1
TUFT1
DOLK
SNX3
LDHD
FAM50A
GLYAT
SLC1A5
CD24
IARS
SERPING1
EHHADH
XXYLT1
MIF
MTX1
ZDHHC9
ENO1
FAM134B
ANO1
FAIM
COMMD8
BCL9
ARHGAP11A
ACLY
SNRPN
ADHFE1
NANOS1
STK17A
PMVK
HEATR1
TSTA3
CGREF1
TSEN15
SRP9
TAF1A
CCNA2
SAMM50
CDK5
CTH
S100A10
CENPI
LMNB1
CKAP2
AACS
BLMH
RNASET2
PHYHIPL
DEPDC1
[truncated: 655 more rows]

## Sheet: Sup table S3
RPS5 binding RNAs
KCNF1
RHBDD3
COL23A1
FGF2
KCNIP1
KCNK9
EFHD2
SPOCK2
EGR3
CCN2
TYSND1
ANKRD6
NKX2-5
PIP5K1C
MCM4
FBXL16
WEE1
TMED7-TICAM2
ASB13
GPR20
IGLON5
GALNT17
LBX1
TUBA8
PDLIM3
ZNF324B
KMT2E
EFCAB1
XPO6
CCDC157
MAP3K9
MIPEP
AP4M1
FYN
ATOH1
TMEM151B
SHISA9
IFT140
SHQ1
FBXO24
VSTM2B
ETV2
LPAR1
GPR83
LYPLAL1
AC254788.1
CYP2D7
SESN1
CYP2F1
PCIF1
AP1AR
PGAP3
BICDL1
B4GALT2
C1orf216
NUDT4B
RASL11A
CCDC27
INPP5K
CAMKV
ADAMTSL4
MON1B
MGRN1
AMBP
SLCO5A1
ZNF664
ENDOV
FAM83G
SLC3A2
ESPN
WNT8B
LDLRAD4
SLC8A2
IL11RA
BICD2
PMM2
AJUBA
CRELD1
FAM219A
CPNE5
MAP2K3
MFAP3
GJB6
MAST1
NEFH
SNAP91
DMAC2
SGSM2
STAT5A
WNT7A
PPP1R16A
ZNF696
MAPK14
SP6
PNMA8A
OXA1L
USH1G
ELN
BDH1
KCNIP3
LRTM2
JAML
FLII
TRIL
VRK3
ACVR1B
KLLN
TIMP3
CIAO1
ASPG
SERP1
CARNMT1
KLC4
DIRAS2
STK11IP
MFHAS1
ATP13A2
FAM234A
SARDH
KCNE4
SP7
APBB1
HSD17B13
PCDHA13
PAPLN
TAF1C
ZSCAN30
UNC45A
PCDHA4
SEMA3F
MCRIP1
AC097634.4
RGS12
RIMKLB
DCBLD2
TNFAIP3
GPR132
MROH1
JDP2
PCBP2
TRIM37
ZFP90
GLYR1
TTBK1
PAFAH1B2
LYPD6
HIC2
BCL2L2
RNF34
SWAP70
SEZ6
GEM
YWHAG
PCDHGB7
PIK3CD
SLC38A1
AQP2
PAK6
PPME1
FAM222B
MAGEB17
TRIM43B
PIK3R5
RABGEF1
TBC1D16
KLF6
SLC16A3
DDX31
ACSM5
MINDY4B
FAM53C
TTC30B
KLHL14
MANBA
PPFIBP2
ZNF395
SLFNL1
CWC22
LCOR
MAGEA11
RPUSD4
SEMA4G
PFKFB3
TCERG1
SETD2
PDPK1
MSH6
COL1A2
NOD2
ELP3
TCTE1
CFAP61
NUP93
MYO19
DCLRE1B
OR2AK2
NICN1
TMOD2
SERPINE1
MAP3K7
VTI1A
HMGCS1
VSIG4
RAE1
PXDNL
GUCY2F
MPP4
RBFOX1
FOXP1
MTMR3
HECTD2
DKK2
NHLRC3
OTOF
PCDHGA8
AKAP13
CHRNA6
VPS13D
SHROOM2
BRD4
MSANTD3-TMEFF1
ASB11
GOSR2
CLUAP1
PRR23D1
ZNF37A
AADACL3
SMC1B
TBC1D31
CLRN1
COPA
NCALD
RPL7
SELENOT
DGKB
RORB
CYFIP2
FBXO36
PMFBP1
TIA1
TAOK1
FAM240A
NBEA
VAMP3
TNPO1
MED13L
OR2L13
RASGRP3
POLR1B
LIN7C
ZNF608
NLRP11
HTR2A
ZDHHC5
COA1
PTPRK
CYP19A1
ZNF611
PMP2
CCDC141
NOTCH2
ANO4
STARD5
VSNL1
TXLNB
ZNF267
ADGRL2
HTR3B
ADAMTS3
LRIT3
KCNJ6
TBC1D32
OR1D2
STAT2
F11R
MIER3
COLGALT2
JAK1
OR1A1
C1orf112
ZNF28
GPR183
IMPA1
GPCPD1
ZHX1
ZWILCH
ERCC6L
CYP2C19
ANGPTL1
ADGRG2
PTGFR
CYSLTR1
PTPRC
BRCA1
EPS15
OR5M1
TLE5
MPND
LRRC10B
PURA
KLF15
SHISA5
GAL3ST1
ANKRD60
ADCK2
FBXL14
PPP2R3B
HEXD
BOP1
ANKRD65
S1PR4
BST1
CDC16
DEXI
CPEB2
DUS1L
MDFI
POU3F1
IRX4
NFKBIE
SUMF1
NDEL1
CAMK2N1
OXLD1
DUSP7
CENPB
ERGIC1
PAXIP1
MYCN
LOXL1
ACTL10
DYRK1B
PTGER1
SMARCD3
DSG2
DPAGT1
LRRC61
POU4F1
SPTBN4
HMX2
NPY4R2
EIF5A
CDR2
TSGA10IP
PPFIA1
ZAR1
PNMA6A
LAYN
LRP3
WNK2
MCU
EXOC3L2
NKX2-1
IKBKG
SLC49A3
SLC52A2
ZDHHC1
HDDC3
C19orf81
CAPN10
ANXA8
ACTR5
WSB2
NFIL3
ACBD3
CAPN15
PSMD3
UBTD1
HGH1
NEU4
EIF2B1
KLHL2
CASD1
TAF6L
KLHL31
NPY4R
PLEKHF1
SCRT1
ATXN7L2
FAM91A1
PKP3
TEAD2
ARFRP1
ANKS1A
ANKRD40
CDCP1
VDAC2
FKBP10
CYP27B1
TPST2
SPATA5L1
GSX1
PKIB
NDUFB10
UCHL5
CARD9
ATP6AP1
ERFE
GSR
SEMA3B
RGS20
MLNR
CDC42EP1
DDIT4L
CHRDL2
PRR35
ARHGEF10L
IQSEC3
TRIM47
TMEM204
MCEMP1
GLDC
TMEM250
DMRT2
NR2F1
GPT2
CPLX1
RABEP2
FBXW2
ADM
RAB11FIP4
KHDRBS1
RHBDL3
GNB1L
OCSTAMP
MADCAM1
AL139300.1
TUB
CYP1B1
IMPA2
PGRMC2
PPAN-P2RY11
GPR143
ENTPD8
COL9A3
HJV
RAB11FIP3
HHIPL1
AC131160.1
MYLIP
C6orf223
ANKRD10
SPATA2L
URI1
MPP5
NAP1L5
SPATA7
STIM2
ZNF416
MBD3
INTS11
HTRA4
MMD2
GP9
NBL1
FDX2
WIPF2
NUDT8
PCMT1
FMNL3
CLBA1
PDZRN4
TENT5B
AUH
CYLD
FUZ
ABHD2
SCNN1D
ANKRD13A
TBC1D10A
TMEM177
KRTCAP3
SPG7
TP53I13
HGFAC
NFKB2
CBY3
FBLN7
POLD4
AC012314.7
AC012314.10
GGN
ACSF2
INPP5A
MYBPH
LPCAT3
DNAJB9
SOX1
SPATA20
EMC9
MOK
CAMKMT
CEND1
PRMT1
BET1L
DCLK2
MDGA1
FOXI1
SSTR4
EPO
DXO
DACT2
DMPK
VOPP1
TEPSIN
ATG4B
SYDE1
CEP78
CCDC115
DHFR
TPD52L1
SPINT2
OTP
FAM217A
PPA2
ANKLE2
TUSC2
RENBP
TNFAIP8L3
ZNF213
PIGZ
ARRDC4
SMO
B4GAT1
TRNT1
PSKH2
RAB4A
WBP2
TSPAN14
INA
KBTBD13
LEFTY2
DGKQ
ELP5
ZNF425
AQP11
CCDC184
FICD
HCK
GRAMD1C
ACHE
AF196969.1
ADSS2
GPRC5C
RBL1
TUBGCP6
CCDC177
MFRP
IFFO1
TMPO
COQ8B
H1-0
ADAMTSL5
FOXD4L4
ARF1
NPFFR2
TBL3
GAA
CBX7
GLS2
RAP2C
ATG3
ACMSD
SLC39A9
MFSD13A
TMC4
IMP3
ASF1B
FAM170B
UGCG
TMEM141
RXRA
SCART1
MAGEA12
THBS1
SNUPN
CDAN1
AP3M2
CHRNE
MAL
KCNJ5
NPY5R
UBQLN4
NAA10
TOR4A
GJA4
HRK
TRPM4
HOXC11
LIMK1
PRR29
MUC5B
TMED3
CRELD2
LINGO1
PAIP2
NKAIN4
CYB5R1
C21orf58
PAX7
IFITM10
POU4F3
ZNF367
PIP5KL1
DNAJC7
FOLR3
RAI1
FAM120A
PRMT9
GATD3A
NFE2L2
PLD3
CERK
JPT1
C3orf62
RABEPK
PTP4A2
SLCO4A1
GTF2IRD1
TMEM39B
TTLL8
CCK
CD7
ZBTB47
PALD1
COLGALT1
BORCS5
DMGDH
ZNF524
TBC1D17
UBE2R2
SLC35F2
HM13
ASB2
PIGQ
NGRN
SPPL2C
RDH10
MMEL1
SOX14
PGRMC1
LRCH3
ANGPTL4
CNN1
CENPX
NYAP1
PEBP1
HOXA5
AGAP1
OLFM1
CNTFR
SCRT2
RFFL
ZNF282
RCC1L
EMX1
LRRC73
INSM2
ABHD17A
SOHLH1
STAC2
PIP4P1
ZNF513
KCNK3
THRA
POMGNT2
FLOT2
MTCH1
ZNF470
PGAP6
AR
SSTR5
FAAH
BTBD19
OAF
ZDHHC14
FZD9
FZD8
ZNF76
OLIG3
DOC2A
TAZ
CHST6
TADA2B
CAMKK1
UBTD2
MAZ
UBAP1L
IGFBP7
TMEFF1
TOR1B
MARK2
C16orf95
RRP9
ARL2BP
SMUG1
ALDH6A1
HIBADH
SCARF2
RBM4B
TRIP13
SLC25A39
SRPK3
TTLL12
PRPSAP2
FOXJ1
GRK6
KCNN4
SDSL
AHCYL1
AC243734.1
UBE2S
DMRT1
CDH24
ADGRD2
SMARCD2
FRA10AC1
ARVCF
SLC12A5
CHUK
MYCL
ANKRD17
CBLN3
GRK2
FAM214B
TMEM37
RAPGEFL1
TBC1D10B
D2HGDH
TNFRSF18
C2CD4C
EIF4E3
MMP24
CHRNA7
XKR8
CHPF
NGLY1
UBR2
C2orf81
TMEM132A
BTBD9
GRM5
P4HA3
EPHX3
GADD45GIP1
PGPEP1L
FZR1
INPP4A
ABHD17C
NRG3
PLEKHM2
MAPK9
CMTM7
GSKIP
CD177
OTUD1
IGFBP4
TBC1D28
AC010531.1
ATG9A
SPIRE2
TSPAN5
FO393400.1
NAGPA
HOXC10
ETFBKMT
ZSWIM8
CLDND2
EN2
ADAMTS9
SLC25A23
RUNX3
PRSS53
C6orf47
E2F1
RASSF1
ASPHD2
KLHL17
TBL1Y
C1QTNF4
NKX3-1
SEPHS1
DLG4
IL17RC
CHKA
SCARA3
TRAF4
ALX3
LYPLA1
PRMT8
DOK1
MTHFD1L
PLTP
TMEM198
KHDRBS2
IL27RA
MAP2K1
MAFB
SHKBP1
UBE3D
SLC6A8
SHPK
FUT5
ISL2
TMEM129
TMEM179
SRRD
PGS1
ZNF423
CBFB
AC136616.1
ATP2A2
RAPH1
SEC14L4
LARGE2
B4GALT5
SLC30A3
NAB2
PPP1R21
C19orf85
ADD1
STAC
CTNNBIP1
SCYL1
STX2
CLDN14
MYEOV
AFTPH
NARS2
CMIP
ARID3C
PTK6
GAS6
CERS5
NDUFS2
ASB10
KRT6C
CD82
KCNQ4
JPH3
KLHL25
GJD3
MAGEA3
MAGEA6
UPK3B
ZCCHC24
PRRG3
RNF121
ENTPD6
SLC24A3
BPGM
DENND5B
GPX3
CCDC189
TDRP
FBN3
TRAPPC2L
DNAAF5
RNF150
DPH7
TUBGCP2
TBC1D22A
PRKD2
PAK4
B4GALNT3
AC236040.1
PHKA1
TGFBR2
SCARB2
EML4
SLC29A2
TRMT2A
RDH13
AC004706.3
PMEPA1
APCDD1L
FBXO45
DYRK3
MYH14
CD8B
ZFAND5
PPP1R3D
OBSL1
NEK7
EIF4H
RTKN2
KCNK7
ARNT2
SLC38A5
TMEFF2
GALNT9
BCAR1
EVX2
MED6
RNF11
AADAT
SLC29A3
ADGRA2
ANKDD1B
SERBP1
HYAL2
NECAB3
TUBA3E
KIF3C
OCIAD1
PPTC7
INPPL1
PPP1R3E
MAPK8IP3
ZNF74
ZNF354B
CYP2D6
EXOC3L1
EDC4
NAIF1
LRRC20
LPCAT4
CACFD1
SLC25A22
TEDC2
LYPD5
PPP3CA
ANKLE1
TICAM2
CEP76
ADRB2
COL8A2
SLC25A45
ARFGAP1
CAPRIN1
TRPV4
ASCC2
EPN1
RBM14-RBM4
TMEM183A
PPP2CA
NACC1
EZR
TUBA3C
PI4K2A
TK1
PXYLP1
TLNRD1
NIPA2
POR
APLF
RHPN1
PRRT3
CLCN7
TWSG1
PRF1
DCAF6
OXSR1
SNCA
WNT9A
LTO1
NXPH2
FGD1
TRIM32
OSBPL2
DIAPH2
FGFR1
AIFM2
AQP3
CHRFAM7A
MRPL57
CDC26
CD276
MAN1B1
TBC1D22B
ZGLP1
SYT17
DKC1
MB
FIBIN
PPP3R1
DBR1
PDP1
TMPPE
ARHGEF1
FURIN
STX1A
ANKZF1
HERC5
BRD2
RALBP1
ANKRD34A
ZBTB9
GLIPR2
SLC34A1
PJA1
NEFL
CSRP1
INPP5F
KLHL30
CC2D1A
MC1R
OPRL1
HERC6
GPR88
RECK
DMRTC2
HPS1
UBALD1
PLPPR4
ANKMY1
AC119396.1
TUBA3D
OPLAH
ZNF333
BLOC1S5
ELOC
MON1A
NECTIN4
FAM131B
ARGLU1
CYRIB
FGFR4
ADM2
ITGB1
EGR2
APEH
SRSF1
PGPEP1
LENG8
WARS2
TPD52L2
MATN1
ZNF567
KANK4
PLAU
POLRMT
VWA5B2
TSPYL5
NOX4
RAB9B
SMIM33
HOXD10
SPACA5
PLCH2
KDM8
SLC45A3
ITGB8
STK25
TBC1D24
TNFRSF8
CDSN
MCHR1
TRIM10
INSIG2
PIK3R6
KCNN1
FCSK
PLPP4
TBC1D20
ZBED1
FBLN2
THSD1
HACE1
CFAP251
WFS1
PPP1R26
KLHL38
INTS5
KCNV1
CMKLR1
ZNF276
AHSA1
ITSN1
PROB1
MISP
LPAR3
RPN1
PHYHIP
GRAP2
PELP1
LHFPL1
KRTAP12-2
ARHGAP33
PLEKHO2
SFXN3
AL354822.1
BCAS3
TRMT61A
SLC16A9
ZBTB42
DNAJA4
MGAT1
BMP8B
RAB3D
NOS3
MAP3K3
ASPH
SV2C
SLC13A2
ENO2
FOXS1
NID2
GREM2
TMEM25
TMEM72
PNPO
PGGHG
ARL16
VSIR
TSPAN9
KIF1A
ZNF131
CDS1
BTBD11
JOSD1
AOC2
LGALS12
KCNJ9
PLPPR5
ENGASE
PCSK9
CYP4F3
P2RX6
MKRN1
TGM7
PAQR8
CPLX2
SV2A
RAD9B
PPT2
MS4A4A
CR1
ILRUN
PSKH1
FRMD1
GEMIN4
LRMDA
MAB21L4
BRAP
RNF44
ABCC4
RBM4
IL22RA1
ZNF655
NPHP4
DGCR8
FOLR1
TNNI1
ACER3
STX1B
MSRB3
FMNL1
WDR47
DEK
ALPI
VTA1
ITPRIP
AMPD2
PHKB
LAS1L
TSFM
MAU2
TOLLIP
RABGAP1L
RNF114
WFIKKN2
ACTN1
C13orf42
MAMLD1
UNC13D
TRIM17
KRT26
LONRF2
ABTB2
IL20RB
GPR173
PRDM2
GFRA2
SLC25A37
POLG
PKD2L2
DENND6B
GRM1
EPHB2
DCUN1D2
DDR1
SLC6A3
ZIC3
CATSPER4
GTPBP1
FHOD1
CDC14B
KRT25
EIF5
FAM237B
GHSR
ACER2
PAMR1
MKRN2
SNPH
JAK3
RNF7
SGCB
IRAK2
ACOT11
HERPUD1
ITIH1
HDAC7
MYD88
CMTR1
HS6ST2
PELO
CLSTN3
RDH16
SYTL2
TAPT1
CAPN14
CCND1
ELP4
BAIAP3
TIPRL
GDF2
TNS2
ALCAM
DCLRE1C
CHRNA2
ZFYVE27
RGL1
FOXN4
TRPV2
SLC23A1
ARSJ
IL21R
MMS19
PNMA5
TBC1D26
ESPNL
ALOXE3
MFAP4
AC004223.3
PRUNE1
PRICKLE1
SLC25A26
COG4
FITM2
PDPR
ACE
SEMA5B
PLEKHG5
LMAN2L
XKR5
ZNF569
PARM1
ADAMTS13
MAPK4
ZMAT2
TTYH2
PRAMEF8
DDHD2
PKP2
TCHP
COL2A1
DPT
SPACA5B
NKPD1
TPK1
SLC12A6
VPS26A
DNAJA1
SLC19A1
SIPA1L2
KIAA0319L
CCNF
UNC45B
SLC12A3
KCP
DMBX1
RNF220
PADI3
SLC24A4
CD83
ALG1
SNTG1
TBC1D2B
ZFP41
TLR9
CMTR2
KCTD19
PCDHGA3
PYGB
WDR55
GSTCD
PRKN
AC097637.1
CPSF1
TSC22D1
C3orf56
BRD1
CAPN5
DNAJC16
TMEM35A
LRIT2
TKFC
ZNF549
ADGRF3
ENC1
PIGV
SPOUT1
SNAPC5
OR6B2
FLRT1
TRAPPC6B
SIGLEC12
PIK3AP1
MAT2A
WDR82
IL4R
LAMB3
DHCR24
GOT1L1
TRIM29
MSR1
CPNE4
BACH2
GARRE1
USP28
TREML4
IVD
DUSP3
COLQ
CCDC120
DDX11
CDC42SE2
SPCS3
PCDHGB3
OR13A1
TSPAN7
LRP1
TCAF1
YPEL4
CCAR2
GREM1
PAX4
SCN4B
PLEKHB2
C1orf158
DCT
TMEM63A
TMEM212
AXL
CTCFL
B4GALT6
HLTF
LAMB1
ARAP1
AARS2
TP53
LPAR6
PCDHGA5
GPR12
AGBL4
PASD1
MAGEA10
RASSF4
PSEN1
MTCL1
Z82190.2
ZNF132
ZNF451
PTPRM
MYRIP
AP000812.5
ARHGAP25
SMIM7
CYRIA
THG1L
OLFML2B
FBXO25
MAST2
VGLL4
THBS3
CDCA7L
NCF2
PARP15
SPATA12
TENT2
GABRB3
NT5C1B
RNF111
CAMK2G
RAP1GDS1
RERE
NOS2
SUFU
NAALAD2
CR1L
DDX17
RGS7BP
ANKRD55
WSCD2
MYBBP1A
KCND1
OR2T10
GALNT16
ALS2CL
AC008676.3
ORC1
CSF1R
ARHGEF15
PHAX
TTI2
SIRPB2
TUBA1C
DHRS9
PCDHGC5
FNBP1L
TTLL9
KCNQ3
PFKFB4
THRB
CCDC92
PCDHGA1
COL9A1
GALM
STYX
FUT8
ZNF496
PRKCQ
MPP2
PHF8
DNAH9
ZFAT
ZNF701
DNAJC5B
VPS36
DCDC2
ZC4H2
PPP3CB
EIF1AD
HHLA1
ZNF568
MRPL22
GMFB
TDP1
AP1G1
ZNF331
CREB3L4
CYFIP1
MTHFD1
ZSCAN25
DISP1
ITGAX
ZNF708
GP2
CHRNG
MCM8
TNS4
ZNF552
EGF
ERMAP
PCSK2
VMP1
RPAP1
ZNF502
CNOT4
SRL
OR7E24
SPIN1
ZNF589
ZNF594
TRAK1
NFE2L1
PRR23D2
ZNF587B
TEAD1
HDGFL3
OCLN
C21orf62
CDH6
MTPN
CYB561D1
DMD
TRIM43
LMO4
ZNF343
HRH2
CEACAM6
ARF4
ABR
ANKRD27
VPS39
OR2H2
WDR37
OXNAD1
NIPAL3
SLAMF7
FNDC7
C8orf44
CDC23
ITGAM
C1orf74
TARDBP
TBCD
FAM234B
MROH7
LACC1
MAP3K14
SPATA31E1
CEACAM7
NUDT4
ZNF189
ZNF300
GBP2
SCML4
NAA30
POLR2M
ZBTB38
RSRC2
OR4K1
RAD54L
PRDM7
SNRNP200
SLC34A2
TRPS1
SYK
SPARC
FGF9
ZNF583
C10orf105
SLC14A2
ARIH2
ZNF429
TM9SF4
OR2J2
CNDP2
PPP6C
SUSD5
TMEM182
XRCC2
TMEM272
ZMAT4
AC008758.1
BTN3A2
PDE11A
DLG3
SLC9A4
PFKFB2
ZBTB18
ITIH6
FCRL3
OR8B8
WDR31
SYT4
E2F3
TDRKH
KLHL18
CD8B2
IGSF22
AC118281.1
COA7
RBM18
PPP3R2
DLG2
OR2T29
MYH2
ATG13
OR2T5
COMMD2
CXCR6
TMEM67
KIF13A
TMEM213
CCNT2
WFDC8
SPPL2A
TACR1
BCAT1
PLAGL1
IL1RAP
IQCA1
MYSM1
BBS9
TECRL
SLITRK1
ADIPOQ
OR8H1
RAB14
CBR4
ENTPD5
DPYSL2
SLFN11
FRMPD2
SLFN13
AMZ2
ZNF709
TASOR
SPRY3
IPO11
ZNF83
SERPINA9
CGA
PTER
METTL22
NUGGC
MTOR
DPH5
PIK3CB
ZBTB26
ALDH7A1
OR8H2
C1QTNF7
AC139677.1
MRPL35
TAB3
CYP2C9
ZNF845
ZNF430
ZNF440
ATF2
PTPRB
ZNF92
UTS2B
TMEM71
OR8B2
MBNL3
SLC35F1
SORD
KCNJ3
OBI1
SETDB2
OR56A4
TTLL5
PDE6A
IFIT1
HEPH
OR51E1
RPS10-NUDT3
STC1
SRPK1
AOX1
OR8B3
ATP6V1A
PCLO
PPEF1
ERVW-1
LRRN3
CYP27C1
LCLAT1
GJA1
YES1
C11orf54
LMO3
CTSS
RACGAP1
CCNB3
SLC10A7
TP63
MAP3K21
OR4S2
SLC35A5
SENP1
CAV1
PSMA4
PLSCR5
GRIK2
BIRC3
TANK
GMNC
OR6Y1
TRPM1
SOCS5
TRPA1
MS4A1
WEE2
DCAF4L1
PPP1R9A
CORIN
OLA1
PUS10
OR10D3
MTUS1
SLC28A3
OR9K2
OR6C4
SLC17A4
GBP6
PCNX1
KIAA1328
GABRR2
MEIS1
ASB15
CFL2
KIAA0825
FANCI
UBE2V2
CAND1
OR13G1
NR5A2
OR2J3
OR7A5
CHM
MECOM
MBNL1
LINS1
NFX1
KIAA0408
AKT3
BMP5
TMEM232
OR4C11
SPINK5
KIAA1109
SLC30A6
RNF38
JMJD1C
DYNC1I2
CNGB3
CAPS2
TAB2
ZNF260
LUM
PDE1A
FEZF2
SPINDOC
PPP2CB
MSANTD3
ZNF358
FNDC10
SULT4A1
CYHR1
GNAI2
CERS2
MEX3D
NPEPL1
CARS2
ADAP1
NKX3-2
MSX1
PRR5-ARHGAP8
GABRA5
OLFM2
NXN
UBE2Q1
NCK2
SHANK3
FBXW5
CCNQ
GLRX5
MNX1
FADS3
FAM89A
MBOAT7
IMMP2L
PDXP
TPRN
EPOR
GNAS
C8orf58
OTUD5
GRK3
FEZ2
ABHD12
ACTG1
SLC15A4
GDF1
PGP
TIGD3
ZDHHC16
GXYLT1
DUSP5
NT5M
CLPTM1
HSF1
ETS1
TLX1
TAMALIN
PHOX2A
CHPT1
ATP8B2
BCL7B
CPLANE2
RCE1
HRH3
SYNDIG1L
LRRC36
SMARCC2
BCL7C
AL451007.3
PINK1
ARHGAP29
SLC2A8
TSPAN11
LAPTM4B
NAGLU
MOB3C
ANKRD13D
CPSF4
CCDC61
CHSY1
PTH2
ARTN
SLC27A4
CERS1
FAM83D
STOML1
ELL2
RINL
TMEM121
CATIP
NR5A1
ECE2
GPR27
EXOC3L4
CYP26C1
RAB26
RALB
CFAP73
HSPBP1
MAPK11
TMTC4
PDLIM2
GALNT12
MAP6D1
BTBD7
NRGN
TRIM33
ALKAL2
CHML
GRAMD1A
LRP8
PDE10A
NECTIN2
PCDHAC2
SLCO3A1
CTBP1
METTL24
ECI1
ARHGEF25
TSSK1B
CABP7
CDK5R2
ATN1
CTSF
FJX1
KCTD17
EHMT1
CCDC9
MAD2L2
CTF1
BHLHE22
KCNK15
GET4
MRAP2
CALY
SKIDA1
TST
CCND3
LDB1
NMI
VGF
TINAGL1
EBF4
TMED2
OXER1
FRS3
SLC25A42
B4GALT7
PDSS1
AMIGO1
ARMC10
SIN3B
RIPPLY3
B3GNT6
GOLGA7
ABHD8
FBXO41
LRRC45
CCDC106
BANF1
RABGGTA
CCDC102A
TRMT9B
NTHL1
MANEAL
KMT5A
PDE5A
ING2
ABHD6
KCNG1
STARD3NL
AC006538.2
PYCR1
SHOX2
PLK5
SH2B2
PRCD
NDUFAF6
ZNF598
RELB
SYNJ1
ETNK2
TP53I3
EED
CYB5R3
MAP3K15
FAM189A2
PPAN
HIC1
MARCHF9
SMIM38
METTL27
KHNYN
ANKRD53
PTOV1
DRD2
TBXA2R
LLGL2
TXNL4A
MLX
HSF4
CPE
ROR1
SERINC2
AMZ1
KIRREL1
FHL3
TEDC1
NLRP6
CLN6
DIPK1C
ST8SIA1
RHOQ
YWHAH
FAM3C
SIRT7
MC5R
HOXA4
NAT14
AQP10
NKX2-3
TRIM72
KCNE3
C10orf95
RNF227
DOCK5
TMCO6
SLC39A3
SOX18
UCN
RGS9BP
FAM160A2
TPBGL
HSD11B2
WFIKKN1
FMR1
LGI3
UBE2Z
MOGS
SLC6A18
ITM2C
GRINA
COL13A1
CTU2
DHRSX
ARHGEF9
HPS6
CYB5R2
PLPP1
GPR153
TRAF3IP1
VPS53
JAKMIP1
DPYS
TJP1
ANKRD11
RNPEP
ATG16L2
THAP3
CPNE2
TBXT
DOCK9
NPTN
CYP27A1
ACTR1B
MAPK8IP1
TMEM171
GBX1
PTPN12
VGLL3
CYBC1
AC144573.1
FZD10
GOLGA6L9
EPM2A
RTP5
POLD2
LONP1
RCOR2
ENPP7
ESRRA
NGEF
FBXO31
NIPSNAP2
[truncated: 3,795 more rows]

## Sheet: Sup table S4
DEGs∩RPS5 binding RNAs
RPL29
RPL15
RPS14
UBA52
RPL7
RPL38
RPL27A
RPS23
HSPBP1
RPL34
RPL41
EXOSC5
PRMT1
ADSL
CLIC1
ZNF524
PTOV1
CNIH4
ERCC2
TPD52L2
EIF3E
CLTA
YDJC
ATIC
HM13
WDR46
GADD45GIP1
NAT9
IPO4
TOMM20
RRP9
UBE2S
SNF8
PAFAH1B3
GRWD1
PPIA
COMMD6
SAC3D1
TUSC2
ILF2
PPIL1
ARPC4
TXNL4A
AHCY
CDKN2AIPNL
EEF1A1
SMYD5
BANF1
TIMM13
ANAPC11
CCDC61
TUBB
PSMD4
EMG1
CCDC97
NAA10
TRMT61A
BOLA3
RNF7
OLA1
CKS2
BIRC5
GGCT
PUS1
CPSF4
ISY1
CCDC12
TRMT1
XPO5
NME6
ZDHHC16
NAT14
PTRH2
DDX56
BCL7C
PSMB4
NSUN5
MBOAT7
DHX34
ARFGAP1
SRSF3
STK25
GLRX3
EIF5B
B4GALT2
LRRC61
ZNF416
SLC25A39
PIGC
PIGU
PWP1
EHMT2
TMEM141
NFKBIL1
HRAS
EIF4B
RRP1
TMEM223
ANP32A
AURKB
PELP1
NUP37
RNASEH2C
LSM5
ETV2
SAP30BP
SPC25
OXA1L
MAD2L1BP
TSSC4
CHKA
CBX3
GNL3
DDX39A
RAE1
TYSND1
MARCKS
SMUG1
CYP2C8
CERS5
RNF220
FAM189B
C12orf73
CBY1
NDRG3
TRMT2A
HSF1
PDAP1
POLL
KHDRBS1
NCLN
KDM1A
VDAC2
ARFRP1
DPH5
FKBP4
ECE2
CDC26
AP4M1
LBR
FBXW9
CDCA3
BMF
TPRN
ZNF574
C8orf33
EGLN2
EXOSC3
AHSA1
FHL3
RCC1
PAK4
SRP14
TMEM161A
RBM3
CENPB
MFF
WDR77
FGFR4
C6
RABGGTB
ZNF420
MBD3
EFTUD2
UBE2Z
NDUFB2
GEMIN6
NT5DC2
ITGB1BP1
LSM14A
VOPP1
DEPDC1B
HJURP
CIZ1
TOR3A
ZNF512
EIF5A
PCBP2
CHEK1
GINS1
NUDCD1
RECQL4
TRIP13
TBC1D22A
MTCH1
UNC119B
TBL2
LMAN2L
TRAPPC1
RABGEF1
ENTPD6
HDDC3
HIC2
RACGAP1
UBL4A
OIP5
MRPL55
ATP6AP1
VPS28
POLDIP3
EXOC6
B9D2
GPANK1
NCBP2
CHCHD7
SYS1
ZNF260
ASF1B
LRPPRC
SLC39A1
SEPHS1
UBE2R2
LAPTM4B
EIF2A
MMS19
COX7C
NPC2
UQCRFS1
MAPRE1
CDC25A
ACSM5
ZNF428
CYHR1
MAGED1
VRK1
ZNF134
SGCE
CDCA8
KIF20A
HDAC5
DKK1
STARD3NL
CENPO
NCAPD2
CDC45
CANT1
CDC42EP1
THADA
ABHD12
MRPL50
NUP85
TK1
LAMTOR2
MRPL22
TRAIP
MRPL2
TRAPPC2L
IMP3
MFSD2A
TDO2
PSMA4
NDUFA6
ALG8
PSMA7
GAL3ST1
SSR3
RAD51C
KIF4A
BTF3L4
ZNF552
ATG9A
PPOX
ZNF74
SERTAD3
SOX12
TIMM10
PCK1
ZWILCH
ACADL
UBQLN4
BUB1
NARF
YWHAE
NDC80
TMEM11
IDH3B
CENPF
G6PD
HINT1
DPH3
ATP6V1E1
ARMC7
PRIM2
MCM4
IFNGR2
ZNF358
DDX1
BORA
DNAJB2
CDCA7
ARMC10
CNDP1
RFC2
GPC3
GATC
GORASP2
GDI2
PDSS1
TOMM40L
MSTO1
DYRK1B
DENR
CD276
FANCI
VPS26A
TXNDC9
STT3A
WDR4
ANXA2
CDC6
SNX8
MOB4
CMTM3
LETMD1
SRPK1
WDR34
PPARGC1A
SERPINB1
PRC1
RTN4IP1
SHKBP1
POLE4
RABIF
GINS2
CMTM7
CPSF1
TUBA1C
IER3IP1
C1orf216
RHBDD3
AIFM2
TRMT12
POLD2
PKIB
COMMD2
CLDND2
DNMT3B
MSH2
RAB11A
ZNF146
SRD5A3
CCNF
ARL16
TXNDC12
E2F1
TDP2
SPCS1
AMD1
YWHAH
ZNF124
PIGZ
MTHFD1L
ACACB
HSD17B6
KLHL23
PTBP3
NUP155
TRIM59
PACSIN3
PSME3
PCMT1
DMGDH
TESC
NECAB3
PPT1
ALPL
ADCK2
LRRC14
PGP
PYCR1
UBE2Q1
HSP90AA1
ERCC6L
NFKBIE
MEGF8
PROZ
BRCA1
CCHCR1
KCTD6
ORC1
MCM8
SPIRE2
TMEM184B
CENPL
TTLL12
BTBD3
CBX2
ORC6
SLC28A1
SOX9
WSB2
ZNF607
POLA2
STIL
TM4SF1
GDA
TMED3
ATP2B1
SLC27A2
TEAD2
HSD11B2
SMARCA2
ACSL4
KCTD17
GLS2
ABHD2
GAS6
VIL1
NUP205
SRC
CYP2C9
PKMYT1
ITM2C
RRM1
RNF43
PM20D2
FGFR3
ACMSD
AASS
ALDH8A1
RDH16
AR
C9
PAPSS1
FGGY
SLC1A4
RAB3D
CHST10
PFKFB4
NLRP6
CES2
CYP4A11
MBNL3
PPP1R16A
E2F8
HS6ST2
SNAP25
SIVA1
TTYH1
RAD21
GNG4
TDRKH
RAD54L
BHMT2
TMEM132A
INHBC
GABRD
CPD
SLC25A5
ALDOB
PLAG1
FBXO43
PRTFDC1
SLC6A8
CAPG
SORL1
GPT2
ZNF880
GNAS
FERMT1
AFM
FCN2
DPYS
TYRO3
RAB11FIP4
PPP1R9A
ADH1B
HEY1
ABCD1
TP53I3
MYCN
C1orf112
ALDH6A1
LYPD1
ZFP36
TP53
KCNE3
MYADM
ZNF28
PTP4A3
PINK1
GBP1
TMEM182
TSPAN3
PLCB1
FRAS1
TRPC1
COL2A1
MAP7D2
FAM83D
APOA5
DCDC2
SEC14L2
SEZ6
BAAT
SLC17A5
TCEAL8
MMAB
IGF2BP2
GBP3
ALCAM
ZNF300
CCNJ
XRCC2
SLC29A2
NAALADL1
NCAPG2
BCAT1
PLCH2
TSPAN7
AGXT
AADAT
GRAMD1A
PIK3C2G
FKBP10
C8B
PAQR8
PCK2
B3GALNT1
CYP39A1
LINGO1
LOXL4
TSC22D3
BDH1
TMOD1
THY1
F13B
HMGCR
ANGPTL4
SLCO1B1
HMMR
C12orf56
ATP1B3
TUBA1B
SPAG5
TSPO
NPBWR1
CPS1
TMSB4X
SULT1C2
CYP4F3
GPT
APOL1
MBOAT1
TFF3
FOXJ1
CTSC
MANEAL
IL17RE
ENC1
SLCO2B1
ADM2
MYRIP
CYP2C18
RELN
APOL3
RCOR2
SEMA7A
ADAMTSL2
LGR5
FOLR1
SOAT2
MRAP2
ADRB2
SLC30A3
TNNI2
ASPG
INMT
TSPAN15
SPATA18
SCARA3
PROS1
MTHFD1
GCGR
MDFI
SOSTDC1
CYP2C19
CD7
TGFB1
MAT1A
MGLL
FBLIM1
ARRDC4
SLC38A1
FAM111B
FCER1G
CNTN3
LHFPL4
SOD2
IDO2
SELENBP1
GXYLT2
ST14
REEP6
TFR2
MASP1
ACY3
DKK4
RHOBTB1
GAD1
FXYD3
NTS
MEP1A
VSNL1
FCGBP
AOX1
LCAT
CPLX2
GREM2
SLC17A4
DPT
LEPR
MFAP4
DACT2
C9orf152
ANKRD65
SPOCK1
LUM
DSG2
EFEMP1
EGR1
C1orf116
UROC1
NDN
A1BG
FBLN2
BBOX1
LBP
IGFALS
DIO1
AXIN2
ETNK2
EPO
FAM133A
SPINT1
AEBP1
BCHE
HGFAC
SLPI
C6orf223
MTTP
SLC2A2
GC
SPINT2
PODXL2
TTR
ITIH1
GPR88
