# Supplementary figures and images for: Unraveling the Role of RNA-Binding Proteins, with a Focus on RPS5, in the Malignant Progression of Hepatocellular Carcinoma
Source: MDPI journal article supplement (doi:10.3390/ijms25020773), 2024-01-07

# Supplementary Figure S1

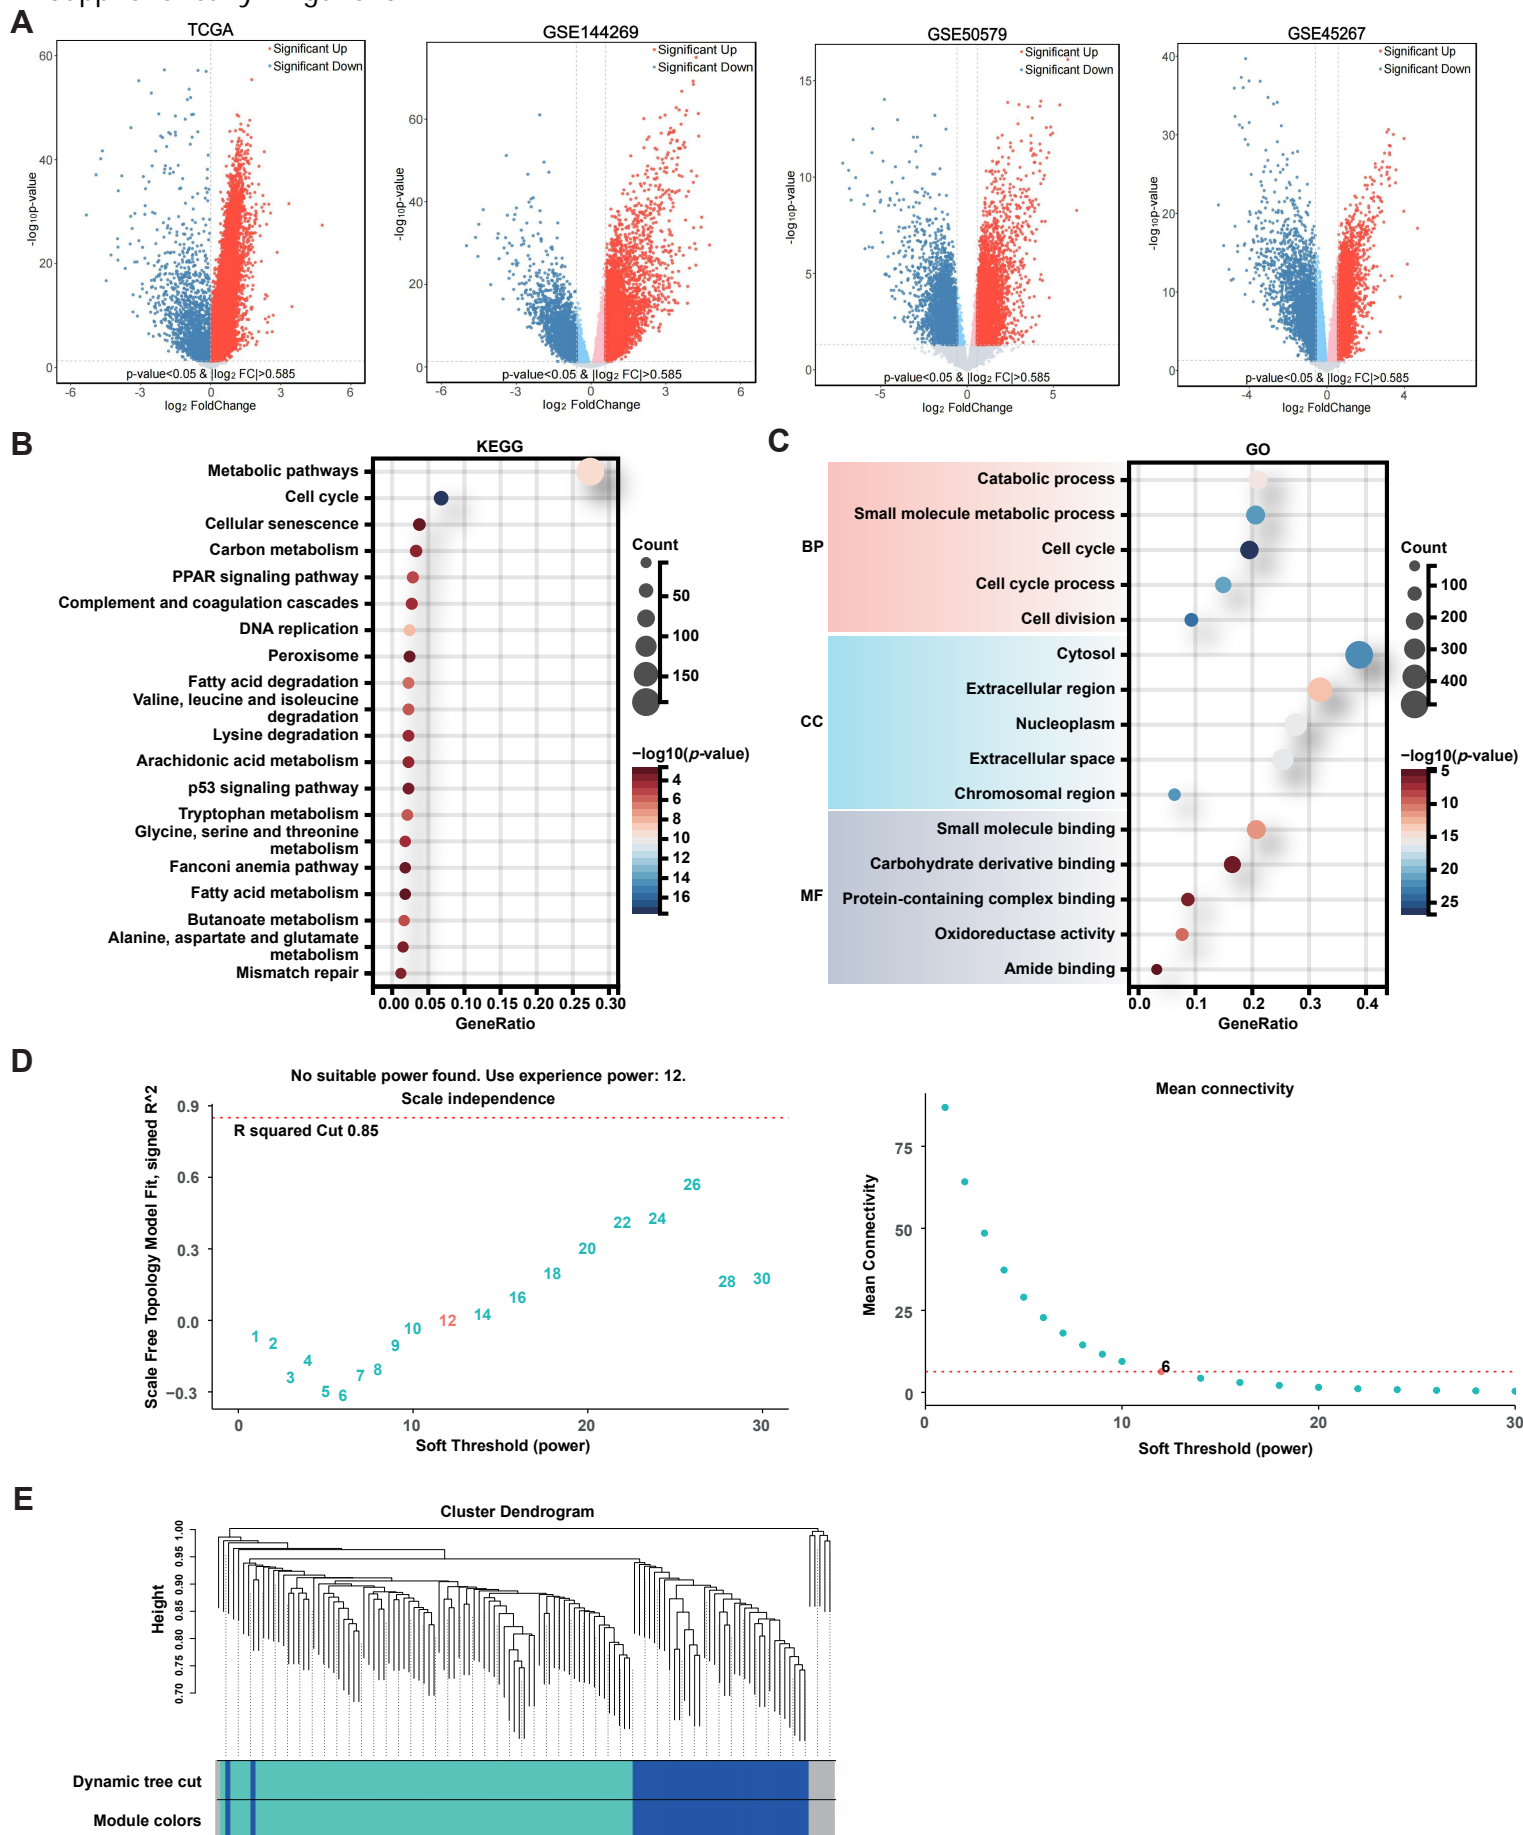

Supplementary Figure S2

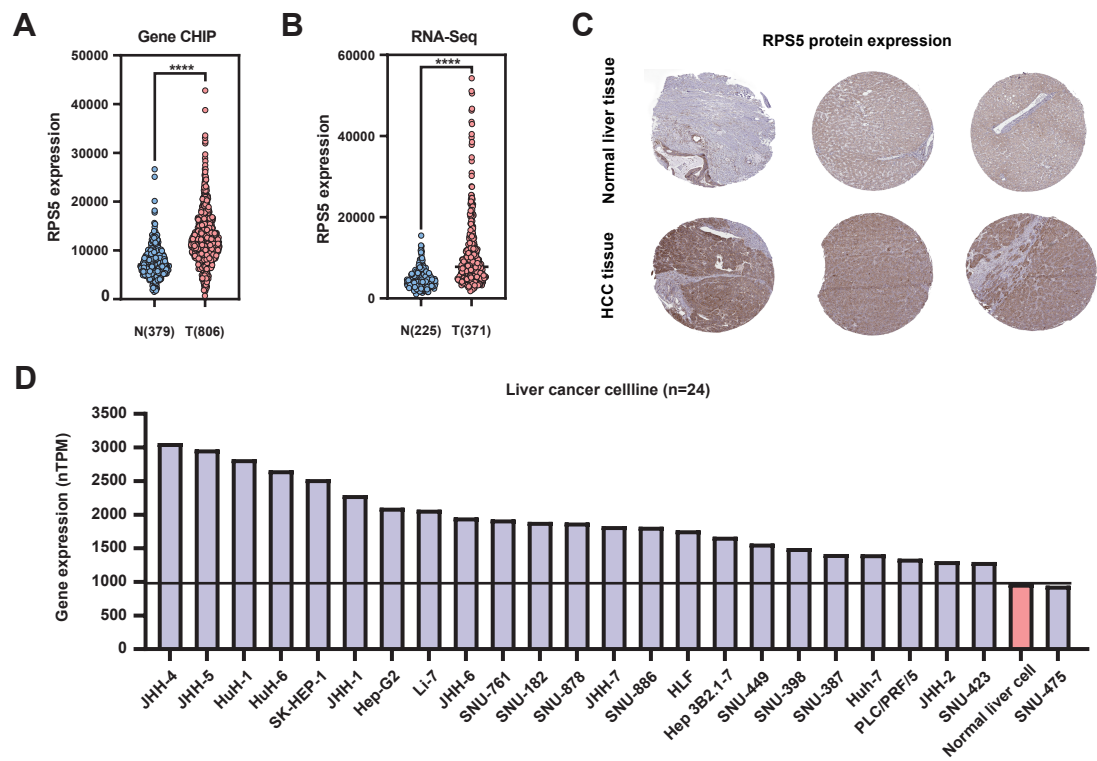



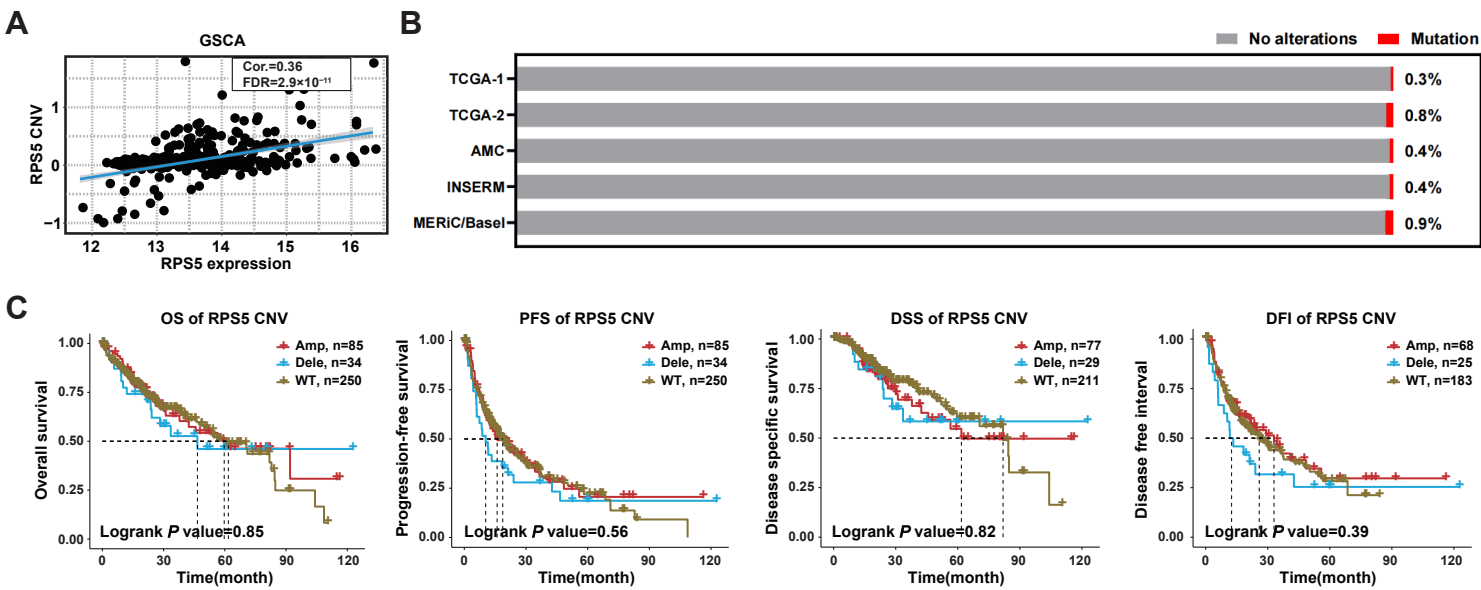

Supplementary Figure S4

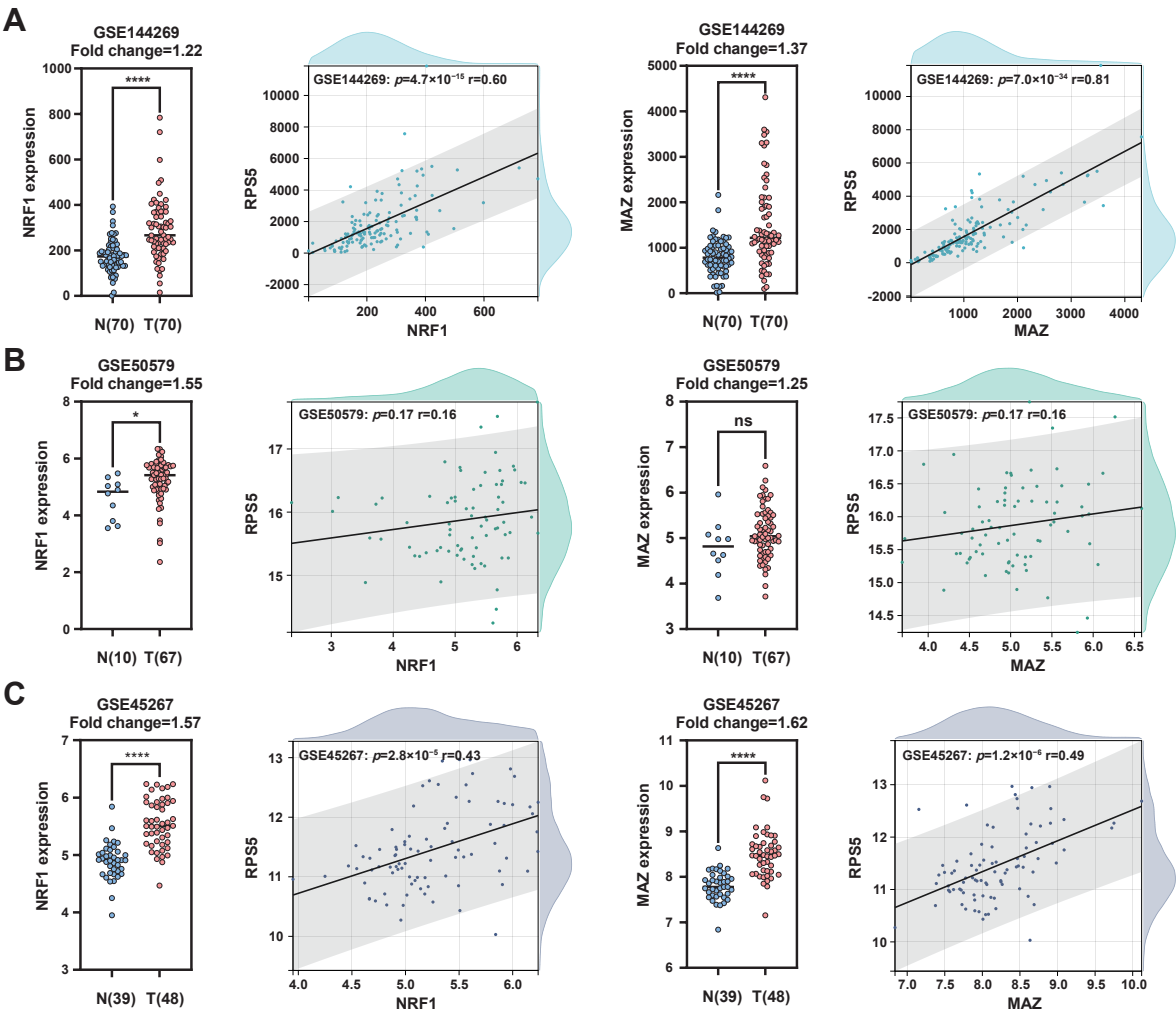

Supplement: s1 [file s1]
